# Supplementary material for: Producer Nutritional Quality Controls Ecosystem Trophic Structure
Source: PubMed Central journal article supplement (PMC2654170; doi:10.1371/journal.pone.0004929), 2009-03-20
Supplement: pone.0004929.s002.pdf [file pone.0004929.s002.pdf]

# Supporting Information: Data Set for Figure 1 in Main Text and Figure S1

| reference                                        | community type                          | ecosystem type | PB (gC m-2) | NPP (gC m-2 y-1) | H (gC m-2 y-1) | %NPP consumed | HB (gC m-2) | Nbiomass (%L) | Pbiomass (%DW) |
|--------------------------------------------------|-----------------------------------------|----------------|-------------|------------------|----------------|---------------|-------------|---------------|----------------|
| Arndt et al. 1993, Behrendt 1990                 | communities of freshwater phytoplankton | aquatic        | .           | 204.400000       | 153.300000     | 75.000000     | .           | 6.300000      | .              |
| Cloern et al. 1987                               | communities of freshwater phytoplankton | aquatic        | 3.625000    | 1976.110000      | 1758.935000    | 89.009974     | .           | .             | .              |
| Coveney et al. 1977                              | communities of freshwater phytoplankton | aquatic        | 5.080000    | 331.785000       | 84.680000      | 25.522552     | 2.16        | .             | .              |
| Cushing 1976                                     | communities of freshwater phytoplankton | aquatic        | 1.811000    | 275.575000       | 124.465000     | 45.165563     | .           | .             | .              |
| Cyr and Pace 1993                                | communities of freshwater phytoplankton | aquatic        | .           | 75.10768486      | .              | .             | 0.112413814 | .             | .              |
| Cyr and Pace 1993                                | communities of freshwater phytoplankton | aquatic        | .           | 65.90231627      | .              | .             | 0.60988213  | .             | .              |
| Cyr and Pace 1993                                | communities of freshwater phytoplankton | aquatic        | .           | 93.39505225      | .              | .             | 1.062256787 | .             | .              |
| Cyr and Pace 1993                                | communities of freshwater phytoplankton | aquatic        | .           | 59.52995878      | .              | .             | 0.121687484 | .             | .              |
| Cyr and Pace 1993                                | communities of freshwater phytoplankton | aquatic        | 25.510000   | 1813.33          | .              | .             | 1.8         | .             | .              |
| Cyr and Pace 1993                                | communities of freshwater phytoplankton | aquatic        | 3.920000    | 724.3277317      | .              | .             | 10.30658424 | .             | .              |
| Cyr and Pace 1993                                | communities of freshwater phytoplankton | aquatic        | .           | 438.7976336      | .              | .             | 2.346884996 | .             | .              |
| Cyr and Pace 1993                                | communities of freshwater phytoplankton | aquatic        | .           | 146.525144       | .              | .             | 0.456054138 | .             | .              |
| Cyr and Pace 1993                                | communities of freshwater phytoplankton | aquatic        | .           | 171.9152696      | .              | .             | 0.794328247 | .             | .              |
| Cyr and Pace 1993                                | communities of freshwater phytoplankton | aquatic        | .           | 258.2110605      | .              | .             | 0.315036347 | .             | .              |
| Cyr and Pace 1993                                | communities of freshwater phytoplankton | aquatic        | .           | 448.4646609      | .              | .             | 0.56340368  | .             | .              |
| Cyr and Pace 1993                                | communities of freshwater phytoplankton | aquatic        | .           | 355.4507481      | .              | .             | 1.149888535 | .             | .              |
| Cyr and Pace 1993                                | communities of freshwater phytoplankton | aquatic        | .           | 296.42388        | .              | .             | 1.180677137 | .             | .              |
| Cyr and Pace 1993                                | communities of freshwater phytoplankton | aquatic        | .           | 441.996598       | .              | .             | 1.03455624  | .             | .              |
| Cyr and Pace 1993                                | communities of freshwater phytoplankton | aquatic        | .           | 277.6651276      | .              | .             | 0.773614492 | .             | .              |
| Cyr and Pace 1993                                | communities of freshwater phytoplankton | aquatic        | .           | 260.0934954      | .              | .             | 0.660194859 | .             | .              |
| Cyr and Pace 1993                                | communities of freshwater phytoplankton | aquatic        | .           | 236.6568305      | .              | .             | 0.626211903 | .             | .              |
| Garnier and Morel et al. 1991                    | communities of freshwater phytoplankton | aquatic        | 1.408000    | 169.360000       | 113.150000     | 66.810345     | 0.534402966 | .             | .              |
| Gliwicz and Hillbricht-Ilkowska 1972             | communities of freshwater phytoplankton | aquatic        | 0.140000    | 121.545000       | 48.180000      | 39.639640     | .           | .             | .              |
| Gliwicz and Hillbricht-Ilkowska 1972             | communities of freshwater phytoplankton | aquatic        | 0.107000    | 123.005000       | 28.214500      | 22.937685     | .           | .             | .              |
| Gliwicz and Hillbricht-Ilkowska 1972             | communities of freshwater phytoplankton | aquatic        | 0.361000    | 190.895000       | 158.775000     | 83.173996     | .           | .             | .              |
| Gulati 1975                                      | communities of freshwater phytoplankton | aquatic        | 4.800000    | 146.000000       | 124.100000     | 85.000000     | .           | .             | .              |
| Gulati 1975                                      | communities of freshwater phytoplankton | aquatic        | 8.000000    | 547.500000       | 354.050000     | 64.666667     | .           | .             | .              |
| Gulati 1984                                      | communities of freshwater phytoplankton | aquatic        | 4.700000    | 867.250000       | .              | .             | 0.760000    | .             | .              |
| Jensen and Schwaerter 1988                       | communities of freshwater phytoplankton | aquatic        | 7.600000    | 840.960000       | 262.800000     | 31.250000     | .           | .             | .              |
| Jespersen et al. 1988                            | communities of freshwater phytoplankton | aquatic        | 6.900000    | 218.635000       | 102.930000     | 47.078464     | 2           | 4.6           | 0.34           |
| Jewson et al. 1981                               | communities of freshwater phytoplankton | aquatic        | 7.000000    | 186.515000       | 73.000000      | 39.138943     | .           | .             | .              |
| Lampert 1978                                     | communities of freshwater phytoplankton | aquatic        | 2.469600    | 379.600000       | 343.100000     | 90.384615     | .           | .             | .              |
| Nakanishi et al. 1992                            | communities of freshwater phytoplankton | aquatic        | 1.733000    | 430.700000       | 231.045000     | 53.644068     | 1.0167      | 5.76          | 0.37           |
| Tilzer 1984                                      | communities of freshwater phytoplankton | aquatic        | 1.447000    | 296.380000       | 222.650000     | 75.123153     | .           | .             | .              |
| Urabe et al. 1995                                | communities of freshwater phytoplankton | aquatic        | .           | 294.190000       | 220.640000     | 74.999150     | .           | 4.910000      | 0.314000       |
| Vadstein et al. 1989                             | communities of freshwater phytoplankton | aquatic        | 4.305000    | 208.415000       | 117.530000     | 56.392294     | .           | .             | .              |
| Weisse et al. 1990                               | communities of freshwater phytoplankton | aquatic        | 5.660000    | 448.950000       | 212.065000     | 47.235772     | 1.1788      | 6.63          | 0.3            |
| Baird and Ulanowicz 1989                         | communities of marine phytoplankton     | aquatic        | 3.500000    | 337.179700       | 73.000000      | 21.650176     | 1.062       | 7.04          | 0.79           |
| Baird and Ulanowicz 1993                         | communities of marine phytoplankton     | aquatic        | 0.413000    | 11.553710        | 7.665000       | 66.342326     | 0.0841      | 5.98          | 0.81           |
| Baird and Ulanowicz 1993                         | communities of marine phytoplankton     | aquatic        | 2.650000    | 37.726400        | 17.885000      | 47.407121     | 1.8045      | 5.3           | 0.86           |
| Baird and Ulanowicz 1993                         | communities of marine phytoplankton     | aquatic        | 3.730000    | 120.252900       | 94.900000      | 78.917016     | 8.7189      | 5.49          | 0.81           |
| Baird and Ulanowicz 1993                         | communities of marine phytoplankton     | aquatic        | 0.750000    | 103.747600       | 19.710000      | 18.998030     | 1.7398      | 7.25          | 0.81           |
| Baird and Ulanowicz 1993 (phytoplankton average) | communities of marine phytoplankton     | aquatic        | .           | .                | .              | .             | .           | 5.490000      | 0.810000       |
| Bienfag and Ziemann 1992                         | communities of marine phytoplankton     | aquatic        | .           | 30.652700        | .              | .             | .           | .             | .              |
| Bienfag and Ziemann 1992                         | communities of marine phytoplankton     | aquatic        | .           | 120.252900       | .              | .             | .           | .             | .              |
| Bishop et al. 1977                               | communities of marine phytoplankton     | aquatic        | 0.800000    | 54.750000        | .              | .             | .           | 5.800000      | 0.700000       |
| Brown et al. 1991                                | communities of marine phytoplankton     | aquatic        | 8.250000    | 1266.032000      | .              | .             | 4.150000    | .             | .              |
| Chavez et al. 1991                               | communities of marine phytoplankton     | aquatic        | .           | 426.779900       | 248.200000     | 58.156441     | .           | .             | .              |
| Durbin et al. 1975                               | communities of marine phytoplankton     | aquatic        | 2.400691    | 507.350000       | 337.387750     | 66.500000     | .           | 5.800000      | .              |
| Frost 1991                                       | communities of marine phytoplankton     | aquatic        | 1.010000    | 200.421500       | 160.600000     | 80.131124     | .           | .             | .              |
| Garber 1984                                      | communities of marine phytoplankton     | aquatic        | .           | 308.000000       | .              | .             | .           | .             | .              |
| Harrison et al. 1993                             | communities of marine phytoplankton     | aquatic        | .           | 0.400843         | 0.302950       | 75.578219     | .           | .             | .              |
| Holligan et al. 1984                             | communities of marine phytoplankton     | aquatic        | 7.000000    | 532.885400       | .              | .             | .           | .             | .              |
| Holligan et al. 1984                             | communities of marine phytoplankton     | aquatic        | 0.800000    | 122.610800       | .              | .             | .           | .             | .              |
| Holligan et al. 1984                             | communities of marine phytoplankton     | aquatic        | 30.000000   | 530.527500       | .              | .             | .           | .             | .              |
| Holligan et al. 1993                             | communities of marine phytoplankton     | aquatic        | .           | 42.442200        | .              | .             | .           | .             | .              |
| Holligan et al. 1993                             | communities of marine phytoplankton     | aquatic        | .           | 87.242300        | .              | .             | .           | .             | .              |
| Holligan et al. 1993                             | communities of marine phytoplankton     | aquatic        | .           | 54.231700        | 5.000500       | 9.220622      | .           | .             | .              |
| Holligan et al. 1993                             | communities of marine phytoplankton     | aquatic        | .           | 73.094900        | .              | .             | .           | .             | .              |
| Iriarte et al. 1991                              | communities of marine phytoplankton     | aquatic        | 9.100000    | 1322.781900      | .              | .             | .           | 5.590000      | 0.760000       |
| Jansson et al. 1984                              | communities of marine phytoplankton     | aquatic        | 1.706048    | 201.721000       | .              | .             | 0.393635    | .             | .              |
| Jensen et al. 1990                               | communities of marine phytoplankton     | aquatic        | .           | 1157.728900      | .              | .             | .           | 5.490000      | 0.810000       |
| Johnson et al. 1981                              | communities of marine phytoplankton     | aquatic        | .           | 2315.457800      | .              | .             | .           | 5.590000      | 0.760000       |
| Johnson et al. 1981                              | communities of marine phytoplankton     | aquatic        | .           | 2723.374500      | .              | .             | .           | .             | .              |
| Johnson et al. 1981                              | communities of marine phytoplankton     | aquatic        | .           | 3671.250300      | .              | .             | .           | .             | .              |
| Joiris et al. 1982                               | communities of marine phytoplankton     | aquatic        | 4.600000    | 516.380100       | 80.300000      | 15.550561     | .           | .             | .              |
| Kamiyama 1994                                    | communities of marine phytoplankton     | aquatic        | .           | 1971.204400      | 295.650000     | 14.998445     | .           | .             | .              |
| Kemp and Boynton 1980                            | communities of marine phytoplankton     | aquatic        | .           | 690.864700       | .              | .             | .           | .             | .              |
| Kemp and Boynton 1980                            | communities of marine phytoplankton     | aquatic        | .           | 530.527500       | .              | .             | .           | .             | .              |
| Kenney et al. 1988                               | communities of marine phytoplankton     | aquatic        | .           | 162.695100       | .              | .             | .           | .             | .              |
| King et al. 1978                                 | communities of marine phytoplankton     | aquatic        | .           | 75.452800        | .              | .             | .           | .             | .              |

|                                  |                                     |         |           |             |            |            |          |          |          |
|----------------------------------|-------------------------------------|---------|-----------|-------------|------------|------------|----------|----------|----------|
| Knauer et al. 1979               | communities of marine phytoplankton | aquatic | 3.200000  | 73.000000   | .          | .          | .        | 4.660000 | 0.592000 |
| Kruse 1993                       | communities of marine phytoplankton | aquatic | .         | 400.843000  | .          | .          | .        | .        | .        |
| Kuparinen 1986                   | communities of marine phytoplankton | aquatic | .         | 141.474000  | .          | .          | .        | .        | .        |
| Lawes et al. 1988                | communities of marine phytoplankton | aquatic | 11.200000 | 742.738500  | 430.700000 | 57.988108  | .        | .        | .        |
| LeBorone et al. 1989             | communities of marine phytoplankton | aquatic | .         | 160.600000  | 158.990000 | 98.997509  | .        | 4.870000 | 0.967700 |
| LeBorone et al. 1997             | communities of marine phytoplankton | aquatic | .         | 164.615000  | 27.370000  | 16.626674  | .        | 3.230000 | 0.326000 |
| Lenz et al. 1993                 | communities of marine phytoplankton | aquatic | .         | 80.168600   | 80.168600  | 100.000000 | .        | .        | .        |
| Lenz et al. 1993                 | communities of marine phytoplankton | aquatic | .         | 238.147900  | 127.750000 | 53.643135  | .        | .        | .        |
| Lenz et al. 1993                 | communities of marine phytoplankton | aquatic | .         | 252.295300  | 127.750000 | 50.635109  | .        | .        | .        |
| Lenz et al. 1993                 | communities of marine phytoplankton | aquatic | .         | 120.252900  | 58.400000  | 48.564317  | .        | .        | .        |
| Lignell et al. 1993              | communities of marine phytoplankton | aquatic | 3.200000  | 288.350000  | 47.450000  | 16.455696  | .        | .        | .        |
| Lindeboom et al. 1989            | communities of marine phytoplankton | aquatic | 2.100000  | 549.390700  | .          | .          | .        | .        | .        |
| McLusky 1981                     | communities of marine phytoplankton | aquatic | .         | 63.663300   | .          | .          | .        | .        | .        |
| Mee 1977                         | communities of marine phytoplankton | aquatic | .         | 2494.658200 | .          | .          | .        | .        | .        |
| Menzel and Ryther 1960           | communities of marine phytoplankton | aquatic | .         | 37.726400   | .          | .          | .        | .        | .        |
| Muller and Suess 1979            | communities of marine phytoplankton | aquatic | 7.500000  | 160.001400  | .          | .          | .        | .        | .        |
| Muller and Suess 1979            | communities of marine phytoplankton | aquatic | 0.860000  | 64.280150   | .          | .          | .        | .        | .        |
| Muller and Suess 1979            | communities of marine phytoplankton | aquatic | 3.000000  | 59.998700   | .          | .          | .        | .        | .        |
| Murray and Wetzel 1987           | communities of marine phytoplankton | aquatic | .         | 188.632000  | .          | .          | .        | .        | .        |
| Murray and Wetzel 1987           | communities of marine phytoplankton | aquatic | .         | 315.958600  | .          | .          | .        | .        | .        |
| Murray et al. 1994               | communities of marine phytoplankton | aquatic | 1.732000  | 430.700000  | .          | .          | 0.948600 | .        | .        |
| Nedwell et al. 1993              | communities of marine phytoplankton | aquatic | 4.240000  | 188.632000  | .          | .          | .        | .        | .        |
| Newell et al. 1981               | communities of marine phytoplankton | aquatic | .         | 448.950000  | .          | .          | .        | .        | .        |
| Nixon and Pilson 1984            | communities of marine phytoplankton | aquatic | .         | 299.453300  | .          | .          | .        | .        | .        |
| Odum and Wilson 1962             | communities of marine phytoplankton | aquatic | .         | 2565.395200 | .          | .          | .        | .        | .        |
| Packard 1979                     | communities of marine phytoplankton | aquatic | .         | 679.075200  | .          | .          | .        | .        | .        |
| Packard and Le B. Williams 1981  | communities of marine phytoplankton | aquatic | 0.630000  | 242.863700  | .          | .          | .        | .        | .        |
| Packard and Le B. Williams 1981  | communities of marine phytoplankton | aquatic | 0.780000  | 214.568900  | .          | .          | .        | .        | .        |
| Packard and Le B. Williams 1981  | communities of marine phytoplankton | aquatic | 0.890000  | 221.642600  | .          | .          | .        | .        | .        |
| Perry 1976                       | communities of marine phytoplankton | aquatic | 0.439560  | 43.800000   | .          | .          | .        | 5.690000 | 0.790000 |
| Pomeroy and Johannes 1968        | communities of marine phytoplankton | aquatic | .         | 848.844000  | .          | .          | .        | 5.590000 | 0.760000 |
| Pomeroy and Johannes 1968        | communities of marine phytoplankton | aquatic | .         | 1242.613300 | .          | .          | .        | 5.490000 | 0.810000 |
| Pomeroy and Johannes 1968        | communities of marine phytoplankton | aquatic | .         | 4258.367400 | .          | .          | .        | .        | .        |
| Pomeroy and Johannes 1968        | communities of marine phytoplankton | aquatic | .         | 509.306400  | .          | .          | .        | .        | .        |
| Pomeroy and Johannes 1968        | communities of marine phytoplankton | aquatic | .         | 580.043400  | .          | .          | .        | .        | .        |
| Pomeroy and Johannes 1968        | communities of marine phytoplankton | aquatic | .         | 315.958600  | .          | .          | 5.490000 | .        | 0.810000 |
| Pomeroy and Johannes 1968        | communities of marine phytoplankton | aquatic | .         | 264.084800  | .          | .          | .        | .        | .        |
| Poumba 1994                      | communities of marine phytoplankton | aquatic | 2.500000  | 374.906100  | .          | .          | .        | .        | .        |
| Prego 1993                       | communities of marine phytoplankton | aquatic | 4.000000  | 127.326600  | .          | .          | .        | .        | .        |
| Randall and Day 1987             | communities of marine phytoplankton | aquatic | .         | 370.190000  | .          | .          | .        | 5.490000 | 0.810000 |
| Randall and Day 1987             | communities of marine phytoplankton | aquatic | .         | 233.432100  | .          | .          | .        | .        | .        |
| Schlesinger 1997                 | communities of marine phytoplankton | aquatic | .         | 235.790000  | .          | .          | .        | .        | .        |
| Shin et al. 1987                 | communities of marine phytoplankton | aquatic | .         | .           | .          | .          | .        | .        | 0.512000 |
| Skjoldal and L nnergren 1978     | communities of marine phytoplankton | aquatic | 2.990000  | 1619.877300 | 175.200000 | 10.815634  | .        | .        | .        |
| Small et al. 1989                | communities of marine phytoplankton | aquatic | 1.270000  | 250.338000  | .          | .          | 0.098267 | .        | .        |
| Smith 1977                       | communities of marine phytoplankton | aquatic | .         | 455.074700  | .          | .          | .        | .        | .        |
| Smith 1977                       | communities of marine phytoplankton | aquatic | .         | 464.506300  | .          | .          | .        | .        | .        |
| Smith 1992                       | communities of marine phytoplankton | aquatic | 1.000000  | 37.726400   | .          | .          | .        | .        | .        |
| Smith 1992                       | communities of marine phytoplankton | aquatic | 1.000000  | 37.726400   | .          | .          | .        | .        | .        |
| Smith 1992                       | communities of marine phytoplankton | aquatic | 1.000000  | 37.726400   | .          | .          | .        | .        | .        |
| Smith 1992                       | communities of marine phytoplankton | aquatic | 1.000000  | 37.726400   | .          | .          | .        | .        | .        |
| Smith and Hollibaugh 1993        | communities of marine phytoplankton | aquatic | .         | 115.537100  | .          | .          | .        | .        | .        |
| Smith et al. 1986                | communities of marine phytoplankton | aquatic | 0.660000  | 247.579500  | .          | .          | .        | .        | .        |
| Smith et al. 1986                | communities of marine phytoplankton | aquatic | 1.100000  | 221.642600  | .          | .          | .        | .        | .        |
| Smith et al. 1986                | communities of marine phytoplankton | aquatic | 0.280000  | 294.737500  | .          | .          | .        | .        | .        |
| Smith et al. 1986                | communities of marine phytoplankton | aquatic | 5.250000  | 858.275600  | .          | .          | .        | .        | .        |
| Sorokin 1983                     | communities of marine phytoplankton | aquatic | 0.715400  | 179.200400  | 127.750000 | 71.288903  | 4.6      | 5.08     | 1.14     |
| Strom and Welschmeyer 1991       | communities of marine phytoplankton | aquatic | .         | 117.895000  | 51.100000  | 43.343653  | .        | .        | .        |
| Suess 1980                       | communities of marine phytoplankton | aquatic | .         | 401.500000  | .          | .          | .        | .        | .        |
| Suess 1980                       | communities of marine phytoplankton | aquatic | .         | 496.400000  | .          | .          | .        | .        | .        |
| Tijssen 1979                     | communities of marine phytoplankton | aquatic | .         | 181.558300  | .          | .          | .        | .        | .        |
| Tijssen and Eijgenraam 1982      | communities of marine phytoplankton | aquatic | .         | 754.528000  | .          | .          | .        | .        | .        |
| Velimirov and Walenta-Simon 1992 | communities of marine phytoplankton | aquatic | .         | 297.095400  | .          | .          | .        | .        | .        |
| Walsh 1988                       | communities of marine phytoplankton | aquatic | .         | 299.993500  | 100.010000 | 33.337389  | .        | .        | .        |
| Walsh 1988                       | communities of marine phytoplankton | aquatic | .         | 166.002000  | 35.999950  | 21.686456  | .        | .        | .        |
| Walsh 1988                       | communities of marine phytoplankton | aquatic | .         | 284.992000  | 87.016000  | 30.532787  | .        | .        | .        |
| Walsh 1988                       | communities of marine phytoplankton | aquatic | .         | 99.973500   | 22.998650  | 23.004746  | .        | .        | .        |
| Walsh 1988                       | communities of marine phytoplankton | aquatic | .         | 161.987000  | 67.999500  | 41.978369  | .        | .        | .        |
| Walsh et al. 1988                | communities of marine phytoplankton | aquatic | .         | 135.000000  | .          | .          | .        | .        | .        |
| Welschmeyer and Lorenzen 1985    | communities of marine phytoplankton | aquatic | 1.947000  | 238.147900  | 182.500000 | 76.633050  | .        | .        | .        |
| Welschmeyer and Lorenzen 1985    | communities of marine phytoplankton | aquatic | 0.324000  | 28.294800   | 26.061000  | 92.105263  | .        | 6.900000 | 0.980000 |

|                                                      |                                     |         |            |             |            |            |          |          |          |
|------------------------------------------------------|-------------------------------------|---------|------------|-------------|------------|------------|----------|----------|----------|
| Zieman et al. 1993                                   | communities of marine phytoplankton | aquatic | .          | 174.484600  | 65.700000  | 37.653753  | .        | .        | .        |
| Cattaneo 1983                                        | freshwater benthic microalgal beds  | aquatic | 0.350000   | 0.876000    | 0.733650   | 83.750000  | .        | .        | .        |
| Flint and Goldman 1975                               | freshwater benthic microalgal beds  | aquatic | 0.239000   | 5.256000    | 1.752000   | 33.333333  | .        | .        | .        |
| Flint and Goldman 1975                               | freshwater benthic microalgal beds  | aquatic | 1.000000   | 25.440500   | 4.485850   | 17.632712  | .        | .        | .        |
| Hunter 1980                                          | freshwater benthic microalgal beds  | aquatic | .          | 2.839700    | 2.434550   | 85.732648  | .        | 3.850000 | .        |
| Jacoby 1987                                          | freshwater benthic microalgal beds  | aquatic | 0.875000   | 132.009550  | 102.200000 | 77.418641  | .        | 4.240000 | 0.405000 |
| Mason and Bryant 1975                                | freshwater benthic microalgal beds  | aquatic | 4.000000   | 7.811000    | 3.606200   | 46.168224  | .        | .        | .        |
| Naiman 1976                                          | freshwater benthic microalgal beds  | aquatic | 35.970000  | 1109.600000 | .          | .          | 2.090000 | .        | .        |
| Stanley 1976                                         | freshwater benthic microalgal beds  | aquatic | 0.912500   | 7.570100    | 1.073100   | 14.175506  | .        | .        | .        |
| Admiraal et al. 1983                                 | marine benthic microalgal beds      | aquatic | 1.114000   | 274.012800  | 40.150000  | 14.652600  | .        | .        | .        |
| Andersen and Kristensen 1988                         | marine benthic microalgal beds      | aquatic | .          | 137.006400  | .          | .          | .        | .        | .        |
| Baird and Ulanowicz 1989                             | marine benthic microalgal beds      | aquatic | 0.177000   | 56.414400   | 17.885000  | 31.702899  | 0.1127   | 7.04     | 1.02     |
| Baird and Ulanowicz 1993                             | marine benthic microalgal beds      | aquatic | 0.895000   | 34.923200   | 34.923200  | 100.000000 | 0.0814   | 5.3      | 0.81     |
| Baird and Ulanowicz 1993                             | marine benthic microalgal beds      | aquatic | .          | 80.592000   | 65.700000  | 81.521739  | .        | .        | .        |
| Baird and Ulanowicz 1993 (microphytobenthos average) | marine benthic microalgal beds      | aquatic | .          | .           | .          | .          | .        | 4.050000 | 0.459000 |
| Burns et al. 1993                                    | marine benthic microalgal beds      | aquatic | .          | 150.438400  | .          | .          | .        | .        | .        |
| Cadee and Hegeman 1977                               | marine benthic microalgal beds      | aquatic | .          | 85.008500   | .          | .          | .        | .        | .        |
| Carpenter 1986                                       | marine benthic microalgal beds      | aquatic | 20.000000  | 577.576000  | 138.700000 | 24.014156  | .        | .        | .        |
| Darley et al. 1981                                   | marine benthic microalgal beds      | aquatic | 1.160000   | 72.532800   | 29.565000  | 40.760870  | .        | .        | .        |
| Davis and Lee 1983                                   | marine benthic microalgal beds      | aquatic | .          | 515.788800  | 350.400000 | 67.934783  | .        | .        | .        |
| Davis and McIntire 1983                              | marine benthic microalgal beds      | aquatic | .          | 91.600400   | .          | .          | .        | .        | .        |
| Gould and Gallagher 1990                             | marine benthic microalgal beds      | aquatic | 17.610000  | 1058.441600 | 343.100000 | 32.415582  | .        | .        | .        |
| Hansen et al. 1992                                   | marine benthic microalgal beds      | aquatic | .          | 67.160000   | .          | .          | .        | .        | .        |
| Hansen et al. 1992                                   | marine benthic microalgal beds      | aquatic | .          | 42.982400   | .          | .          | .        | .        | .        |
| Klumpp et al. 1992                                   | marine benthic microalgal beds      | aquatic | .          | 80.592000   | 20.440000  | 25.362319  | .        | 1.760000 | .        |
| Kristensen 1993                                      | marine benthic microalgal beds      | aquatic | 1.208000   | 110.142400  | .          | .          | .        | .        | .        |
| Lindeboom and Sande 1989                             | marine benthic microalgal beds      | aquatic | .          | 265.953600  | .          | .          | .        | .        | .        |
| Lindeboom and Sande 1989                             | marine benthic microalgal beds      | aquatic | .          | 179.988800  | .          | .          | .        | .        | .        |
| Lindeboom and Sande 1989                             | marine benthic microalgal beds      | aquatic | .          | 222.971200  | .          | .          | .        | .        | .        |
| Lindeboom and Sande 1989                             | marine benthic microalgal beds      | aquatic | .          | 131.633600  | .          | .          | .        | .        | .        |
| McLahlan and Bate 1984                               | marine benthic microalgal beds      | aquatic | 1.260000   | 198.793600  | 58.400000  | 29.377203  | .        | .        | .        |
| Merino et al. 1992                                   | marine benthic microalgal beds      | aquatic | .          | 1249.176000 | .          | .          | .        | .        | .        |
| Montagna 1984                                        | marine benthic microalgal beds      | aquatic | .          | 3153.833600 | 237.250000 | 7.522591   | .        | .        | .        |
| Murray and Wetzel 1987                               | marine benthic microalgal beds      | aquatic | .          | 77.905600   | .          | .          | .        | .        | .        |
| Murray and Wetzel 1987                               | marine benthic microalgal beds      | aquatic | .          | 166.556800  | .          | .          | .        | .        | .        |
| Nicotri 1977                                         | marine benthic microalgal beds      | aquatic | 0.047300   | 0.209539    | 0.127750   | 60.967113  | .        | .        | .        |
| Nicotri 1977                                         | marine benthic microalgal beds      | aquatic | 0.108000   | 0.564144    | 0.438000   | 77.639752  | .        | .        | .        |
| Nicotri 1977                                         | marine benthic microalgal beds      | aquatic | 0.320000   | 2.955040    | 1.642500   | 55.583004  | .        | .        | .        |
| Ostergard and Kristensen 1992                        | marine benthic microalgal beds      | aquatic | .          | 110.142400  | .          | .          | .        | .        | .        |
| Panatmat 1988                                        | marine benthic microalgal beds      | aquatic | .          | 107.456000  | .          | .          | .        | .        | .        |
| Rizzo and Wetzel 1985                                | marine benthic microalgal beds      | aquatic | .          | 231.030400  | .          | .          | .        | .        | .        |
| Rizzo and Wetzel 1985                                | marine benthic microalgal beds      | aquatic | .          | 99.396800   | .          | .          | .        | .        | .        |
| Rizzo and Wetzel 1985                                | marine benthic microalgal beds      | aquatic | .          | 112.828800  | .          | .          | .        | .        | .        |
| Vidal 1991                                           | marine benthic microalgal beds      | aquatic | .          | 88.651200   | .          | .          | .        | .        | .        |
| Anderson et al. 1981                                 | marine macroalgal beds              | aquatic | 481.264637 | 1500.150000 | .          | .          | .        | 3.800000 | .        |
| Atkinson and Grigg 1984                              | marine macroalgal beds              | aquatic | .          | 628.785500  | .          | .          | .        | .        | .        |
| Bach and Josselyn 1979                               | marine macroalgal beds              | aquatic | .          | 1131.500000 | .          | .          | .        | .        | .        |
| Baird and Ulanowicz 1993                             | marine macroalgal beds              | aquatic | 318.340000 | 526.534400  | 167.900000 | 31.887755  | 15.9716  | .        | .        |
| Baird and Ulanowicz 1993                             | marine macroalgal beds              | aquatic | 96.500000  | 513.102400  | 31.025000  | 6.046551   | 0.8823   | .        | .        |
| Bak 1994                                             | marine macroalgal beds              | aquatic | .          | 435.813650  | 346.750000 | 79.563823  | .        | .        | .        |
| Bak 1994                                             | marine macroalgal beds              | aquatic | .          | 837.138450  | 452.600000 | 54.065131  | .        | .        | .        |
| Bak 1994                                             | marine macroalgal beds              | aquatic | .          | 1018.988750 | 540.200000 | 53.013343  | .        | .        | .        |
| Bak 1994                                             | marine macroalgal beds              | aquatic | .          | 683.506300  | 273.750000 | 40.050838  | .        | .        | .        |
| Bak 1994                                             | marine macroalgal beds              | aquatic | .          | 1078.560400 | 492.750000 | 45.685898  | .        | .        | .        |
| Birch et al. 1983                                    | marine macroalgal beds              | aquatic | .          | 216.007000  | 21.600700  | 10.000000  | .        | 2.600000 | 0.235600 |
| Brouwer 1996                                         | marine macroalgal beds              | aquatic | 260.000000 | 854.100000  | .          | .          | .        | 3.210000 | 0.530000 |
| Bustamante et al. 1995                               | marine macroalgal beds              | aquatic | 125.320000 | 1326.5      | .          | .          | 81.6     | 2.42     | .        |
| Bythell et al. 1993                                  | marine macroalgal beds              | aquatic | .          | 467.167150  | 43.800000  | 9.375659   | .        | .        | .        |
| Bythell et al. 1993                                  | marine macroalgal beds              | aquatic | .          | 467.167150  | 28.470000  | 6.094178   | .        | .        | .        |
| Chapman and Craigie 1978                             | marine macroalgal beds              | aquatic | 316.153846 | 1500.150000 | .          | .          | .        | 2.170000 | .        |
| Drew and Hastings 1992                               | marine macroalgal beds              | aquatic | .          | 3.066000    | 0.328500   | 10.714286  | .        | 2.000000 | 0.250000 |
| Dunton and Schell 1986                               | marine macroalgal beds              | aquatic | .          | 7.519084    | 7.190500   | 10.000000  | .        | 1.900000 | 0.250000 |
| Egan and Yarish 1990                                 | marine macroalgal beds              | aquatic | 418.367347 | 1496.500000 | .          | .          | .        | 2.060000 | .        |
| Gathuso et al. 1993                                  | marine macroalgal beds              | aquatic | .          | 2409.000000 | .          | .          | .        | .        | .        |
| Gathuso et al. 1993                                  | marine macroalgal beds              | aquatic | .          | 1943.917000 | .          | .          | .        | .        | .        |
| Gathuso et al. 1993                                  | marine macroalgal beds              | aquatic | .          | 7493.486500 | .          | .          | .        | .        | .        |
| Gathuso et al. 1993                                  | marine macroalgal beds              | aquatic | .          | 2523.956750 | .          | .          | .        | .        | .        |
| Geertz-Hansen et al. 1993; Pedersen and Borum 1996   | marine macroalgal beds              | aquatic | .          | .           | .          | .          | .        | 3.160000 | 0.278000 |
| Gerard 1976                                          | marine macroalgal beds              | aquatic | .          | 1299.546000 | 131.400000 | 10.111223  | .        | 2.420000 | 0.310000 |
| Hanisack 1979                                        | marine macroalgal beds              | aquatic | 126.696833 | 306.600000  | .          | .          | .        | 1.390000 | .        |
| Hanisack 1979                                        | marine macroalgal beds              | aquatic | 127.675277 | 252.580000  | .          | .          | .        | 2.270000 | .        |
| Hanisack 1979                                        | marine macroalgal beds              | aquatic | 34.567901  | 71.540000   | .          | .          | .        | 2.380000 | .        |

|                                              |                                             |         |   |             |             |            |           |             |          |          |          |
|----------------------------------------------|---------------------------------------------|---------|---|-------------|-------------|------------|-----------|-------------|----------|----------|----------|
| Hatcher et al. 1992                          | marine macroalgal beds                      | aquatic | . | 1000.176650 | .           | .          | .         | .           | .        | .        | .        |
| Hauxwell et al. 1998; Peckol and Rivers 1996 | marine macroalgal beds                      | aquatic | . | 486.670000  | 127.567500  | 26.212320  | .         | 2.600000    | .        | 0.235600 | .        |
| Josselyn and Mathieson 1980                  | marine macroalgal beds                      | aquatic | . | 954.000000  | .           | .          | .         | .           | .        | .        | .        |
| Khailov and Burlakova 1969                   | marine macroalgal beds                      | aquatic | . | 0.070628    | 0.018250    | 25.839793  | .         | .           | .        | .        | .        |
| Khailov and Burlakova 1969                   | marine macroalgal beds                      | aquatic | . | 1.412550    | 0.511000    | 36.175711  | .         | .           | .        | .        | .        |
| Khailov and Burlakova 1969                   | marine macroalgal beds                      | aquatic | . | 543.047000  | 102.200000  | 18.819734  | .         | .           | .        | .        | .        |
| Khailov and Burlakova 1969                   | marine macroalgal beds                      | aquatic | . | 2.825100    | 0.547500    | 19.379845  | .         | .           | .        | .        | .        |
| Khailov and Burlakova 1969                   | marine macroalgal beds                      | aquatic | . | 25.112000   | 8.395000    | 33.430233  | .         | .           | .        | .        | .        |
| Khailov and Burlakova 1969                   | marine macroalgal beds                      | aquatic | . | 2.354250    | 0.766500    | 32.558140  | .         | .           | .        | .        | .        |
| Khailov and Burlakova 1969                   | marine macroalgal beds                      | aquatic | . | 7.690550    | 2.117000    | 27.527290  | .         | .           | .        | 0.250000 | .        |
| Khailov and Burlakova 1969                   | marine macroalgal beds                      | aquatic | . | 13.968550   | 4.380000    | 31.356154  | .         | .           | .        | .        | .        |
| Khailov and Burlakova 1969                   | marine macroalgal beds                      | aquatic | . | 7.062750    | 1.679000    | 23.772610  | .         | .           | .        | .        | .        |
| Khailov and Burlakova 1969                   | marine macroalgal beds                      | aquatic | . | 20.403500   | 6.205000    | 30.411449  | .         | .           | .        | .        | .        |
| Kiene and Hutchings 1994                     | marine macroalgal beds                      | aquatic | . | 495.385300  | 5.840000    | 1.178880   | .         | .           | .        | .        | .        |
| Kiene and Hutchings 1994                     | marine macroalgal beds                      | aquatic | . | 495.385300  | 178.850000  | 36.103211  | .         | .           | .        | .        | .        |
| Kiene and Hutchings 1994                     | marine macroalgal beds                      | aquatic | . | 495.385300  | 91.250000   | 18.420006  | .         | .           | .        | .        | .        |
| Kiene and Hutchings 1994                     | marine macroalgal beds                      | aquatic | . | 495.385300  | 178.850000  | 36.103211  | .         | .           | .        | .        | .        |
| Kiene and Hutchings 1994                     | marine macroalgal beds                      | aquatic | . | 495.385300  | 12.045000   | 2.431441   | .         | .           | .        | .        | .        |
| Kiene and Hutchings 1994                     | marine macroalgal beds                      | aquatic | . | 495.385300  | 160.600000  | 32.419210  | .         | .           | .        | .        | .        |
| Klumpp and Polunin 1989                      | marine macroalgal beds                      | aquatic | . | 693.719000  | 521.950000  | 75.239398  | .         | .           | .        | .        | .        |
| Klumpp et al. 1989                           | marine macroalgal beds                      | aquatic | . | 17.348300   | 183.631500  | 127.750000 | 1.733400  | .           | .        | .        | .        |
| Klumpp et al. 1993                           | marine macroalgal beds                      | aquatic | . | .           | 32.959500   | 5.475000   | .         | 1.760000    | .        | .        | .        |
| Koop et al. 1982                             | marine macroalgal beds                      | aquatic | . | 264.000000  | 1175.555500 | 105.850000 | 9.004254  | 2.420000    | .        | 0.310000 | .        |
| Kristensen et al. 1992                       | marine macroalgal beds                      | aquatic | . | .           | 535.199500  | .          | .         | .           | .        | .        | .        |
| Lapointe et al. 1981                         | marine macroalgal beds                      | aquatic | . | 211.904762  | 1299.400000 | .          | .         | 3.950000    | .        | .        | .        |
| Mann 1972 (averages for whole bay)           | marine macroalgal beds                      | aquatic | . | 73.810000   | 659.190000  | 62.050000  | 9.413068  | 2.420000    | .        | 0.310000 | .        |
| Mann 1972 (averages for seaweed zone)        | marine macroalgal beds                      | aquatic | . | 264.100000  | 1750.000000 | .          | .         | 12.950000   | 1.820000 | 0.270000 | .        |
| Mann 1985                                    | marine macroalgal beds                      | aquatic | . | .           | 1123.762000 | 135.050000 | 12.017669 | .           | .        | .        | .        |
| Mann 1985                                    | marine macroalgal beds                      | aquatic | . | .           | 272.775450  | .          | .         | .           | .        | .        | .        |
| Mann 1985                                    | marine macroalgal beds                      | aquatic | . | .           | 3821.991650 | .          | .         | .           | .        | .        | .        |
| Mann 1985                                    | marine macroalgal beds                      | aquatic | . | .           | 1072.289700 | .          | .         | .           | .        | .        | .        |
| Mann 1985                                    | marine macroalgal beds                      | aquatic | . | .           | 2085.007750 | .          | .         | .           | .        | .        | .        |
| Mann 1985                                    | marine macroalgal beds                      | aquatic | . | .           | 3608.787850 | .          | .         | .           | .        | .        | .        |
| Mann 1985                                    | marine macroalgal beds                      | aquatic | . | .           | 1931.375600 | .          | .         | .           | .        | .        | .        |
| Mann 1985                                    | marine macroalgal beds                      | aquatic | . | .           | 1191.433000 | .          | .         | .           | .        | .        | .        |
| Mann 1985                                    | marine macroalgal beds                      | aquatic | . | .           | 6270.700000 | .          | .         | .           | .        | .        | .        |
| Mann 1985                                    | marine macroalgal beds                      | aquatic | . | .           | 2821.815000 | .          | .         | .           | .        | .        | .        |
| Mann 1985                                    | marine macroalgal beds                      | aquatic | . | .           | 1881.210000 | .          | .         | .           | .        | .        | .        |
| Mann 1985                                    | marine macroalgal beds                      | aquatic | . | .           | 4047.736850 | .          | .         | .           | .        | .        | .        |
| Mann 1985                                    | marine macroalgal beds                      | aquatic | . | .           | 5925.811500 | .          | .         | .           | .        | .        | .        |
| Mann 1988                                    | marine macroalgal beds                      | aquatic | . | .           | 916.588000  | 113.150000 | 12.344696 | .           | .        | .        | .        |
| Mann 1988                                    | marine macroalgal beds                      | aquatic | . | .           | 200.421500  | .          | .         | .           | .        | .        | .        |
| Mann 1988                                    | marine macroalgal beds                      | aquatic | . | .           | 200.421500  | .          | .         | .           | .        | .        | .        |
| McLusky 1981                                 | marine macroalgal beds                      | aquatic | . | .           | 92.600500   | 25.915000  | 27.985810 | .           | .        | .        | .        |
| McQuaid and Branch 1985-exposed              | marine macroalgal beds                      | aquatic | . | 146.320000  | 1548.75486  | .          | .         | 20.76       | 2.29     | 0.25     | .        |
| McQuaid and Branch 1985-protected            | marine macroalgal beds                      | aquatic | . | 93.430000   | 988.93538   | .          | .         | 15.672      | 2.29     | 0.25     | .        |
| Nakamori et al. 1992                         | marine macroalgal beds                      | aquatic | . | .           | 1423.500000 | .          | .         | .           | .        | .        | .        |
| Neudecker 1979                               | marine macroalgal beds                      | aquatic | . | .           | 316.670350  | 105.850000 | 33.425927 | .           | .        | .        | .        |
| Newell et al. 1982                           | marine macroalgal beds                      | aquatic | . | 454.600000  | 1124.200000 | 135.050000 | 12.012987 | 6.26        | 2.54     | 0.25     | .        |
| Patterson et al. 1991                        | marine macroalgal beds                      | aquatic | . | .           | 874.762650  | .          | .         | .           | .        | .        | .        |
| Polunin and Klumpp 1992                      | marine macroalgal beds                      | aquatic | . | 26.400000   | 718.831000  | 386.900000 | 53.823500 | .           | 2.500000 | 0.310000 | .        |
| Reichardt and Dieckmann 1985                 | marine macroalgal beds                      | aquatic | . | .           | 5.292500    | .          | .         | .           | 4.300000 | .        | .        |
| Sakshaug et al. 1994                         | marine macroalgal beds                      | aquatic | . | .           | 18.250000   | .          | .         | .           | 1.100000 | .        | .        |
| Sfriso and Marcomini 1997                    | marine macroalgal beds                      | aquatic | . | .           | 815.994000  | 530.418000 | 65.002684 | .           | 1.980000 | 0.164500 | .        |
| Smith 1973                                   | marine macroalgal beds                      | aquatic | . | .           | 3009.936000 | .          | .         | .           | .        | .        | .        |
| Smith 1973                                   | marine macroalgal beds                      | aquatic | . | .           | 1241.598600 | .          | .         | .           | .        | .        | .        |
| Smith 1973                                   | marine macroalgal beds                      | aquatic | . | .           | 627.070000  | .          | .         | .           | .        | .        | .        |
| Smith and Jokiel 1978                        | marine macroalgal beds                      | aquatic | . | .           | 1883.400000 | .          | .         | .           | .        | .        | .        |
| Smith and Pesret 1974                        | marine macroalgal beds                      | aquatic | . | .           | 949.000000  | .          | .         | .           | .        | .        | .        |
| Smith et al. 1978                            | marine macroalgal beds                      | aquatic | . | .           | 1883.400000 | .          | .         | .           | .        | .        | .        |
| Sorokin 1983                                 | marine macroalgal beds                      | aquatic | . | .           | 7.533600    | 2.372500   | 31.492248 | .           | 2.5      | 0.31     | .        |
| Spencer 1977                                 | marine macroalgal beds                      | aquatic | . | .           | 1357.606550 | .          | .         | .           | .        | .        | .        |
| Wallentinus 1981                             | marine macroalgal beds                      | aquatic | . | .           | .           | .          | .         | .           | .        | .        | 0.310000 |
| Wanders 1977                                 | marine macroalgal beds                      | aquatic | . | 37.680000   | 811.431500  | 536.550000 | 66.123881 | .           | .        | .        | .        |
| Williams and Carpenter 1988                  | marine macroalgal beds                      | aquatic | . | .           | 733.650000  | 550.237500 | 75.000000 | .           | 2.670000 | .        | .        |
| Yap et al. 1994                              | marine macroalgal beds                      | aquatic | . | .           | 3386.178000 | .          | .         | .           | .        | .        | .        |
| Anderson 1976                                | meadows of freshwater submerged macrophytes | aquatic | . | 30.800000   | 46.720000   | 16.060000  | 34.375000 | .           | 1.730000 | .        | .        |
| Anderson 1976                                | meadows of freshwater submerged macrophytes | aquatic | . | .           | 1500.150000 | .          | .         | .           | 3.800000 | .        | .        |
| Bayley et al. 1985                           | meadows of freshwater submerged macrophytes | aquatic | . | .           | 327.600000  | .          | .         | .           | .        | .        | .        |
| Boyd 1970                                    | meadows of freshwater submerged macrophytes | aquatic | . | 84.120983   | 162.425000  | .          | .         | .           | 1.320000 | 0.170000 | .        |
| Cyr and Pace 1993                            | meadows of freshwater submerged macrophytes | aquatic | . | .           | 39.63466511 | .          | .         | 0.079733229 | .        | .        | .        |

|                                            |                                             |             |            |             |             |           |             |          |          |
|--------------------------------------------|---------------------------------------------|-------------|------------|-------------|-------------|-----------|-------------|----------|----------|
| Cyr and Pace 1993                          | meadows of freshwater submerged macrophytes | aquatic     | .          | 55.35910801 | .           | .         | 0.021274965 | .        | .        |
| Cyr and Pace 1993                          | meadows of freshwater submerged macrophytes | aquatic     | .          | 55.35910801 | .           | .         | 0.090994764 | .        | .        |
| Cyr and Pace 1993                          | meadows of freshwater submerged macrophytes | aquatic     | .          | 80.18187793 | .           | .         | 0.142593054 | .        | .        |
| Cyr and Pace 1993                          | meadows of freshwater submerged macrophytes | aquatic     | .          | 94.07592976 | .           | .         | 0.34102553  | .        | .        |
| Cyr and Pace 1993                          | meadows of freshwater submerged macrophytes | aquatic     | .          | 139.2610317 | .           | .         | 0.17156403  | .        | .        |
| Cyr and Pace 1993                          | meadows of freshwater submerged macrophytes | aquatic     | .          | 106.4406617 | .           | .         | 0.298820126 | .        | .        |
| Flint and Goldman 1975                     | meadows of freshwater submerged macrophytes | aquatic     | 51.430000  | 201.115000  | 28.068500   | 13.956443 | .           | .        | .        |
| Jupp and Spence 1977                       | meadows of freshwater submerged macrophytes | aquatic     | 35.000000  | 111.325000  | 15.494250   | 13.918033 | .           | 0.385000 | .        |
| Klopatek and Stearns 1978                  | meadows of freshwater submerged macrophytes | aquatic     | 50.000000  | 401.500000  | 52.560000   | 13.090909 | .           | .        | .        |
| Mason and Bryant 1975                      | meadows of freshwater submerged macrophytes | aquatic     | 146.508197 | 326.200500  | .           | .         | .           | 2.600000 | 0.200000 |
| Neeley and Davis 1985                      | meadows of freshwater submerged macrophytes | aquatic     | .          | 369.600000  | .           | .         | .           | .        | .        |
| Neill 1992                                 | meadows of freshwater submerged macrophytes | aquatic     | 128.000000 | 321.200000  | .           | .         | .           | 1.760000 | 0.210000 |
| Odum 1957                                  | meadows of freshwater submerged macrophytes | aquatic     | 323.600000 | 1462.200000 | 316.820000  | 21.667351 | 14.8        | 2.22     | 0.27     |
| Rogers and Breen 1982                      | meadows of freshwater submerged macrophytes | aquatic     | .          | 93.650000   | .           | .         | .           | .        | .        |
| Schalles and Shure 1989                    | meadows of freshwater submerged macrophytes | aquatic     | 13.820000  | 24.272500   | .           | .         | .           | .        | .        |
| Sheldon 1987                               | meadows of freshwater submerged macrophytes | aquatic     | 32.800000  | 74.460000   | 8.650500    | 11.617647 | .           | .        | .        |
| Soszka 1975                                | meadows of freshwater submerged macrophytes | aquatic     | 37.800000  | 81.030000   | 5.292500    | 6.531532  | .           | .        | .        |
| Soszka 1975                                | meadows of freshwater submerged macrophytes | aquatic     | 19.250000  | 62.780000   | 24.345500   | 38.779070 | .           | .        | .        |
| Soszka 1975                                | meadows of freshwater submerged macrophytes | aquatic     | 76.200000  | 167.535000  | 15.220500   | 9.084967  | .           | .        | .        |
| Soszka 1975                                | meadows of freshwater submerged macrophytes | aquatic     | 19.750000  | 55.480000   | 16.023500   | 28.881579 | .           | .        | .        |
| Wallace and O'Hop 1985                     | meadows of freshwater submerged macrophytes | aquatic     | 13.000000  | 365.000000  | 62.050000   | 17.000000 | .           | 4.020000 | 0.450000 |
| Baird and Ulanowicz 1993                   | seagrass meadows                            | aquatic     | 162.100000 | 665.442450  | .           | .         | 9.4015      | .        | .        |
| Baldwin and Lovvorn 1994                   | seagrass meadows                            | aquatic     | .          | 7.865750    | 2.701000    | 34.338747 | .           | .        | .        |
| Cebrian and Duarte 1998 (CN)               | seagrass meadows                            | aquatic     | .          | 149.110000  | 12.670000   | 8.497083  | .           | 2.380000 | 0.188700 |
| Cebrian and Duarte 1998 (EA, CS, TH)       | seagrass meadows                            | aquatic     | .          | 484.790000  | 57.620000   | 11.885559 | .           | 2.220000 | 0.288500 |
| Cebrian and Duarte 1998 (TC)               | seagrass meadows                            | aquatic     | .          | 89.300000   | 5.270000    | 5.901456  | .           | 2.120000 | 0.189000 |
| Cebrian and Duarte 1998 (TT)               | seagrass meadows                            | aquatic     | .          | 570.520000  | 54.770000   | 9.600014  | .           | 2.550000 | 0.189600 |
| Cebrian and Duarte 1998 (ZM)               | seagrass meadows                            | aquatic     | .          | 335.800000  | 18.800000   | 5.598571  | .           | 2.290000 | 0.199700 |
| Cebrian and Duarte 1998 (ZN)               | seagrass meadows                            | aquatic     | .          | 126.870000  | 5.836000    | 4.599884  | .           | 2.720000 | 0.279000 |
| Cebrian et al. 1996                        | seagrass meadows                            | aquatic     | .          | 188.2508727 | 8.2830384   | 4.400000  | .           | 1.650000 | 0.112000 |
| Cebrian et al. 1996                        | seagrass meadows                            | aquatic     | .          | 402.961014  | 9.268103323 | 2.300000  | .           | 2.590000 | 0.165000 |
| Cebrian et al. 1996                        | seagrass meadows                            | aquatic     | .          | 677.4919008 | 10.16237851 | 1.500000  | .           | 2.150000 | 0.156000 |
| Cebrian et al. 1996                        | seagrass meadows                            | aquatic     | .          | 238.953863  | 3.584307945 | 1.500000  | .           | 2.640000 | 0.119000 |
| Cebrian et al. 1996                        | seagrass meadows                            | aquatic     | .          | 951.903414  | 19.03806828 | 2.000000  | .           | 1.810000 | 0.124000 |
| Cebrian et al. 1996                        | seagrass meadows                            | aquatic     | .          | 961.8975716 | 17.31415629 | 1.800000  | .           | 1.860000 | 0.113000 |
| Cebrian et al. 1996                        | seagrass meadows                            | aquatic     | .          | 375.776658  | 4.885096554 | 1.300000  | .           | 1.320000 | 0.103000 |
| Cebrian et al. 1996                        | seagrass meadows                            | aquatic     | .          | 458.8172563 | 7.799893357 | 1.700000  | .           | 2.100000 | 0.107000 |
| Cebrian et al. 1996                        | seagrass meadows                            | aquatic     | .          | 167.8219703 | 1.510397733 | 0.900000  | .           | 1.420000 | 0.115000 |
| Cebrian et al. 1996                        | seagrass meadows                            | aquatic     | .          | 919.9008    | 2.7597024   | 0.300000  | .           | 2.020000 | 0.229000 |
| Cebrian et al. 1996                        | seagrass meadows                            | aquatic     | .          | 676.3322816 | 10.82131651 | 1.600000  | .           | 1.330000 | 0.181000 |
| Cebrian et al. 1996                        | seagrass meadows                            | aquatic     | .          | 1075.268133 | 9.6774132   | 0.900000  | .           | 1.970000 | 0.235000 |
| Erfteimer et al. 1993                      | seagrass meadows                            | aquatic     | 53.800000  | 335.080950  | .           | .         | .           | .        | .        |
| Erfteimer et al. 1993                      | seagrass meadows                            | aquatic     | 47.800000  | 476.664450  | .           | .         | .           | .        | .        |
| Erfteimer et al. 1993                      | seagrass meadows                            | aquatic     | 22.830000  | 220.241000  | .           | .         | .           | .        | .        |
| Greenway 1976                              | seagrass meadows                            | aquatic     | 99.600000  | 876.244550  | 423.400000  | 48.319844 | 0.794328247 | 1.800000 | 0.140000 |
| Harrison 1982                              | seagrass meadows                            | aquatic     | .          | 360.000000  | .           | .         | .           | .        | .        |
| Hauxwell et al. 2002; Hauxwell et al. 1998 | seagrass meadows                            | aquatic     | 32.000000  | 158         | .           | .         | 0.141       | 1.93     | 0.35     |
| Hauxwell et al. 2002; Hauxwell et al. 1998 | seagrass meadows                            | aquatic     | 12.800000  | 63.6        | .           | .         | 0.162       | 1.47     | 0.35     |
| Hemminga and Nieuwenhuize 1991             | seagrass meadows                            | aquatic     | .          | 529.250000  | .           | .         | .           | .        | .        |
| Jacobs et al. 1981                         | seagrass meadows                            | aquatic     | .          | 10.950000   | 0.511000    | 4.666667  | .           | .        | 0.202579 |
| Kirkman and Reid 1979                      | seagrass meadows                            | aquatic     | .          | 160.461300  | 3.431000    | 2.138210  | .           | .        | .        |
| Klumpp et al. 1989                         | seagrass meadows                            | aquatic     | 273.728100 | 1094.912400 | 76.650000   | 7.000560  | 0.569900    | 1.200000 | 0.120000 |
| Klumpp et al. 1993                         | seagrass meadows                            | aquatic     | .          | 582.065500  | 69.350000   | 11.914467 | .           | 1.210000 | .        |
| Lindeboom and De Bree 1982                 | seagrass meadows                            | aquatic     | .          | 493.969100  | .           | .         | .           | .        | .        |
| Nienhuis and Groenedijk 1986               | seagrass meadows                            | aquatic     | 17.000000  | 34.609300   | 2.628000    | 7.593335  | .           | .        | .        |
| Ott and Maurer 1977                        | seagrass meadows                            | aquatic     | 461.600000 | 555.321950  | 51.100000   | 9.201869  | .           | .        | .        |
| Peduzzi and Herndl 1991                    | seagrass meadows                            | aquatic     | .          | 250.000000  | .           | .         | .           | .        | .        |
| Pellikaan and Nienhuis 1988                | seagrass meadows                            | aquatic     | 50.000000  | 162.034450  | 8.869500    | 5.473836  | .           | 2.510000 | 0.416200 |
| Perqant et al. 1994                        | seagrass meadows                            | aquatic     | .          | 190.398600  | .           | .         | .           | .        | .        |
| Romero et al. 1992                         | seagrass meadows                            | aquatic     | 89.100000  | 201.480000  | .           | .         | .           | .        | .        |
| Tersching 1989                             | seagrass meadows                            | aquatic     | .          | 489.249650  | 17.520000   | 3.580994  | .           | .        | .        |
| Wahbeh and Mahasneh 1985                   | seagrass meadows                            | aquatic     | .          | 321.200000  | .           | .         | .           | .        | .        |
| Wetzel and Penhale 1983                    | seagrass meadows                            | aquatic     | .          | 1054.010500 | .           | .         | .           | .        | .        |
| Wetzel and Penhale 1983                    | seagrass meadows                            | aquatic     | .          | 602.516450  | .           | .         | .           | .        | .        |
| Zieman et al. 1979                         | seagrass meadows                            | aquatic     | 30.800000  | 393.287500  | 58.400000   | 14.849188 | .           | .        | .        |
| Zieman et al. 1979                         | seagrass meadows                            | aquatic     | .          | 2.320000    | 47.194500   | 14.694509 | .           | .        | .        |
| Billings 1987                              | tundra shrublands and grasslands            | terrestrial | 75.270000  | 72.000000   | .           | .         | 0.12        | 1.0975   | 0.09275  |
| Bliss 1975                                 | tundra shrublands and grasslands            | terrestrial | 57.200000  | 35.489700   | .           | .         | 0.017       | 0.88     | 0.139    |
| Bliss 1975                                 | tundra shrublands and grasslands            | terrestrial | 399.200000 | 54.394700   | 2.467400    | 4.536104  | 0.077       | 0.880000 | 0.092750 |
| Chapin et al. 1980                         | tundra shrublands and grasslands            | terrestrial | 63.000000  | 47          | .           | .         | 0.09        | 1.447    | 0.1072   |
| McNaughton et al. 1989                     | tundra shrublands and grasslands            | terrestrial | .          | 58.199250   | 0.032000    | 0.054983  | .           | .        | .        |
| McNaughton et al. 1989                     | tundra shrublands and grasslands            | terrestrial | .          | 21.099993   | 0.062999    | 0.298574  | .           | .        | .        |

|                                  |                                               |             |   |              |             |            |             |             |          |          |
|----------------------------------|-----------------------------------------------|-------------|---|--------------|-------------|------------|-------------|-------------|----------|----------|
| McNaughton et al. 1989           | tundra shrublands and grasslands              | terrestrial | . | 21.099993    | 0.099999    | 0.473929   | .           | .           | .        | .        |
| McNaughton et al. 1989           | tundra shrublands and grasslands              | terrestrial | . | 20.75957802  | .           | .          | 0.006353639 | .           | .        | .        |
| McNaughton et al. 1989           | tundra shrublands and grasslands              | terrestrial | . | 22.28739728  | .           | .          | 0.021076705 | .           | .        | .        |
| McNaughton et al. 1989           | tundra shrublands and grasslands              | terrestrial | . | 20.75957802  | .           | .          | 0.052728614 | .           | .        | .        |
| McNaughton et al. 1989           | tundra shrublands and grasslands              | terrestrial | . | 61.41043258  | .           | .          | 0.052728614 | .           | .        | .        |
| McNaughton et al. 1989           | tundra shrublands and grasslands              | terrestrial | . | 20.6259903   | .           | .          | 0.17491478  | .           | .        | .        |
| Moore 1989                       | tundra shrublands and grasslands              | terrestrial | . | 176.800000   | .           | .          | .           | .           | .        | .        |
| Moore 1989                       | tundra shrublands and grasslands              | terrestrial | . | 120.200000   | .           | .          | .           | .           | .        | .        |
| Moore 1989                       | tundra shrublands and grasslands              | terrestrial | . | 171.600000   | .           | .          | .           | .           | .        | .        |
| Moore 1989                       | tundra shrublands and grasslands              | terrestrial | . | 145.800000   | .           | .          | .           | .           | .        | .        |
| Moore 1989                       | tundra shrublands and grasslands              | terrestrial | . | 235.200000   | .           | .          | .           | .           | .        | .        |
| Bach et al. 1986                 | freshwater and marine marshes                 | terrestrial | . | 836.711400   | 459.900000  | 54.965189  | .           | .           | .        | .        |
| Bach et al. 1986                 | freshwater and marine marshes                 | terrestrial | . | 547.846750   | 302.950000  | 55.298311  | .           | .           | .        | .        |
| Bach et al. 1986                 | freshwater and marine marshes                 | terrestrial | . | 567.768450   | 313.900000  | 55.286623  | .           | .           | .        | .        |
| Bernard and Solsky 1977          | freshwater and marine marshes                 | terrestrial | . | 347.708895   | 470.850000  | .          | .           | 1.600000    | .        | .        |
| Buth 1987                        | freshwater and marine marshes                 | terrestrial | . | .            | 3733.326580 | .          | .           | .           | .        | .        |
| Buth 1987                        | freshwater and marine marshes                 | terrestrial | . | .            | 5574.091660 | .          | .           | .           | .        | .        |
| Buth 1987                        | freshwater and marine marshes                 | terrestrial | . | .            | 4090.921095 | .          | .           | .           | .        | .        |
| Cahoon and Stevenson 1986        | freshwater and marine marshes                 | terrestrial | . | 117.600000   | 482.105140  | 73.000000  | 15.141925   | .           | .        | .        |
| Cammen 1980                      | freshwater and marine marshes                 | terrestrial | . | 182.800000   | 226.4       | .          | .           | 2.9         | 0.9      | 0.18     |
| Craft et al. 1988                | freshwater and marine marshes                 | terrestrial | . | .            | .           | .          | .           | 0.780000    | .        | 0.053800 |
| de la Cruz 1973                  | freshwater and marine marshes                 | terrestrial | . | 400.000000   | 419.998200  | .          | .           | .           | .        | .        |
| de la Cruz 1973                  | freshwater and marine marshes                 | terrestrial | . | 400.000000   | 419.998200  | .          | .           | .           | .        | .        |
| Gallagher et al. 1980            | freshwater and marine marshes                 | terrestrial | . | 280.085197   | 959.950000  | .          | .           | 0.940000    | .        | 0.150000 |
| Graneli 1989                     | freshwater and marine marshes                 | terrestrial | . | 165.000000   | 40.880000   | .          | .           | .           | .        | .        |
| Hopkinson et al. 1978            | freshwater and marine marshes                 | terrestrial | . | 323.200000   | 539.878070  | .          | .           | .           | .        | .        |
| Hopkinson et al. 1978            | freshwater and marine marshes                 | terrestrial | . | 301.600000   | 1267.020120 | 211.700000 | 16.708496   | .           | .        | .        |
| Hopkinson et al. 1978            | freshwater and marine marshes                 | terrestrial | . | 550.400000   | 2415.506125 | .          | .           | .           | .        | .        |
| Hopkinson et al. 1978            | freshwater and marine marshes                 | terrestrial | . | 396.000000   | 926.359050  | .          | .           | .           | .        | .        |
| Hopkinson et al. 1978            | freshwater and marine marshes                 | terrestrial | . | 259.200000   | 598.647085  | .          | .           | .           | .        | .        |
| Karagatzides and Hutchinson 1991 | freshwater and marine marshes                 | terrestrial | . | 111.800000   | 103.295000  | .          | .           | .           | .        | .        |
| Karagatzides and Hutchinson 1991 | freshwater and marine marshes                 | terrestrial | . | 138.000000   | 161.330000  | .          | .           | .           | .        | .        |
| Lee 1990                         | freshwater and marine marshes                 | terrestrial | . | 623.920000   | 879.543055  | 8.760000   | 0.995972    | .           | 1.280000 | .        |
| Parsons and De la Cruz 1980      | freshwater and marine marshes                 | terrestrial | . | 242.500000   | 832.110000  | 2.964700   | 0.356287    | 0.089000    | 0.780000 | 0.140000 |
| Patriquin and McClung 1978       | freshwater and marine marshes                 | terrestrial | . | 66.768293    | 159.870000  | .          | .           | .           | 2.200000 | .        |
| Patriquin and McClung 1978       | freshwater and marine marshes                 | terrestrial | . | 119.883041   | 299.300000  | .          | .           | .           | 2.030000 | .        |
| Reader and Stewart 1972          | freshwater and marine marshes                 | terrestrial | . | .            | 192.600000  | 43.880000  | 22.782970   | .           | 1.590000 | 0.114000 |
| Reader and Stewart 1972          | freshwater and marine marshes                 | terrestrial | . | .            | 447.400000  | 36.920000  | 8.252123    | .           | 2.250000 | 0.175000 |
| Richardson et al. 1999           | freshwater and marine marshes                 | terrestrial | . | .            | 1196.400000 | 0.760000   | 0.063524    | .           | 0.723400 | 0.013500 |
| Smalley 1960                     | freshwater and marine marshes                 | terrestrial | . | .            | 503.006500  | 2.867221   | 0.570017    | .           | .        | .        |
| Squiers and Good 1974            | freshwater and marine marshes                 | terrestrial | . | 266.592428   | 436.905000  | .          | .           | .           | 0.990000 | .        |
| Teal 1962                        | freshwater and marine marshes                 | terrestrial | . | 250.000000   | 992.100660  | 51.100000  | 5.150687    | 0.281000    | 0.900000 | 0.180000 |
| Udell et al. 1969                | freshwater and marine marshes                 | terrestrial | . | 107.664234   | 215.350000  | 15.074500  | 7.000000    | .           | 2.140000 | .        |
| White et al. 1978                | freshwater and marine marshes                 | terrestrial | . | 671.600000   | 517.964200  | .          | .           | .           | .        | .        |
| White et al. 1978                | freshwater and marine marshes                 | terrestrial | . | 589.200000   | 1387.546405 | 229.950000 | 16.572419   | .           | .        | .        |
| Boring et al. 1981               | temperate and tropical shrublands and forests | terrestrial | . | .            | 350.200000  | 14.600000  | 4.169046    | .           | 0.338900 | 0.061900 |
| Bray 1964                        | temperate and tropical shrublands and forests | terrestrial | . | 60.000000    | 132.130000  | 9.198000   | 6.961326    | .           | .        | .        |
| Chew and Chew 1970               | temperate and tropical shrublands and forests | terrestrial | . | 184.000000   | 52.560000   | 1.040250   | 1.979167    | 0.063641054 | 0.639600 | .        |
| Day 1982                         | temperate and tropical shrublands and forests | terrestrial | . | 232.273680   | 233.503215  | .          | .           | .           | .        | .        |
| Day 1982                         | temperate and tropical shrublands and forests | terrestrial | . | 446.683592   | 252.518304  | .          | .           | .           | .        | .        |
| Day 1982                         | temperate and tropical shrublands and forests | terrestrial | . | 238.231947   | 239.493022  | .          | .           | .           | .        | .        |
| Day 1982                         | temperate and tropical shrublands and forests | terrestrial | . | 208.449088   | 209.552509  | .          | .           | .           | .        | .        |
| De Angelis et al. 1981           | temperate and tropical shrublands and forests | terrestrial | . | .            | 706.599850  | 15.000040  | 2.122848    | .           | .        | .        |
| De Angelis et al. 1981           | temperate and tropical shrublands and forests | terrestrial | . | .            | 599.600100  | 2.200000   | 0.366911    | .           | .        | .        |
| De Angelis et al. 1981           | temperate and tropical shrublands and forests | terrestrial | . | .            | 449.132500  | 7.520095   | 1.674360    | .           | .        | .        |
| De Angelis et al. 1981           | temperate and tropical shrublands and forests | terrestrial | . | .            | 402.441700  | 36.399990  | 9.044786    | .           | .        | .        |
| De Angelis et al. 1981           | temperate and tropical shrublands and forests | terrestrial | . | .            | 516.000500  | 16.000140  | 3.100799    | .           | .        | .        |
| De Angelis et al. 1981           | temperate and tropical shrublands and forests | terrestrial | . | .            | 382.812000  | 8.400110   | 2.194317    | .           | .        | .        |
| De Angelis et al. 1981           | temperate and tropical shrublands and forests | terrestrial | . | .            | 489.757000  | 6.840100   | 1.396631    | .           | .        | .        |
| De Angelis et al. 1981           | temperate and tropical shrublands and forests | terrestrial | . | .            | 403.120600  | 7.120055   | 1.766234    | .           | .        | .        |
| Frangi and Lugo 1985             | temperate and tropical shrublands and forests | terrestrial | . | 9999.000000  | 876.000000  | 1.113250   | 0.127083    | 1.310000    | .        | 0.033400 |
| Gosz et al. 1978                 | temperate and tropical shrublands and forests | terrestrial | . | 7156.310000  | 468.952000  | 31.426500  | 6.701432    | .           | 0.320000 | 0.061900 |
| Gray 1982                        | temperate and tropical shrublands and forests | terrestrial | . | 2592.890000  | 423.400000  | .          | .           | .           | 0.640000 | 0.044000 |
| Gray 1982                        | temperate and tropical shrublands and forests | terrestrial | . | 370.000000   | 141.985000  | .          | .           | .           | 0.530000 | 0.110000 |
| Grier and Logan 1977             | temperate and tropical shrublands and forests | terrestrial | . | 26862.800000 | 332.000000  | 1.598700   | 0.481536    | 0.446       | 0.073300 | 0.011870 |
| Grier and Logan 1977             | temperate and tropical shrublands and forests | terrestrial | . | 32528.800000 | 318.400000  | 2.398050   | 0.753156    | 0.668       | 0.073400 | 0.011880 |
| Grier and Logan 1977             | temperate and tropical shrublands and forests | terrestrial | . | 20017.600000 | 251.200000  | 2.398050   | 0.954638    | 0.668       | 0.073300 | 0.011860 |
| Grier and Logan 1977             | temperate and tropical shrublands and forests | terrestrial | . | 22590.400000 | 303.600000  | 2.398050   | 0.789872    | 0.668       | 0.073300 | 0.011870 |
| Grier and Logan 1977             | temperate and tropical shrublands and forests | terrestrial | . | 39300.400000 | 402.800000  | 2.398050   | 0.595345    | 0.668       | 0.070800 | 0.011300 |
| Grodzinski et al. 1966           | temperate and tropical shrublands and forests | terrestrial | . | .            | 98.980700   | 1.376543   | 1.390718    | .           | .        | .        |
| Gruner, age 300                  | temperate and tropical shrublands and forests | terrestrial | . | 7104         | 421.2       | .          | .           | 0.253528    | .        | .        |
| Gruner, age 5000                 | temperate and tropical shrublands and forests | terrestrial | . | 10644        | 388.208     | .          | .           | 1.477688    | .        | .        |

|                                          |                                               |             |              |             |            |           |             |          |          |
|------------------------------------------|-----------------------------------------------|-------------|--------------|-------------|------------|-----------|-------------|----------|----------|
| Gruner, age 150000                       | temperate and tropical shrublands and forests | terrestrial | 5784         | 363.404     | .          | .         | 2.398276    | .        | .        |
| Gruner, age 1400000                      | temperate and tropical shrublands and forests | terrestrial | 5500         | 558         | .          | .         | 0.837252    | .        | .        |
| Gruner, age 4100000                      | temperate and tropical shrublands and forests | terrestrial | 8232         | 298.516     | .          | .         | 0.210936    | .        | .        |
| Harris et al. 1975                       | temperate and tropical shrublands and forests | terrestrial | 8011.000000  | 451.100000  | 4.489500   | 0.995234  | 0.101       | 0.3389   | 0.0619   |
| Haukioja and Koponen 1975                | temperate and tropical shrublands and forests | terrestrial | .            | 67.999865   | 3.559991   | 5.235291  | 0.042672096 | .        | .        |
| Kira 1978                                | temperate and tropical shrublands and forests | terrestrial | 17400.000000 | 846.800000  | .          | .         | .           | .        | .        |
| Leigh and Windsor 1983                   | temperate and tropical shrublands and forests | terrestrial | 243.800000   | 280.320000  | 36.500000  | 13.020833 | .           | .        | .        |
| Lowman 1988                              | temperate and tropical shrublands and forests | terrestrial | 456.400000   | 228.490000  | 50.005000  | 21.884984 | .           | .        | .        |
| Lowman 1988                              | temperate and tropical shrublands and forests | terrestrial | 387.600000   | 193.815000  | 52.925000  | 27.306968 | .           | .        | .        |
| Lowman 1988                              | temperate and tropical shrublands and forests | terrestrial | 490.400000   | 245.280000  | 35.186000  | 14.345238 | .           | .        | .        |
| McInnes et al. 1992                      | temperate and tropical shrublands and forests | terrestrial | .            | 490.001550  | 228.000900 | 46.530649 | .           | 1.390000 | .        |
| McInnes et al. 1992                      | temperate and tropical shrublands and forests | terrestrial | .            | 228.000900  | 63.999100  | 28.069670 | .           | 1.210000 | .        |
| McInnes et al. 1992                      | temperate and tropical shrublands and forests | terrestrial | .            | 353.998900  | 152.000600 | 42.938156 | .           | 1.260000 | .        |
| McInnes et al. 1992                      | temperate and tropical shrublands and forests | terrestrial | .            | 301.999905  | 60.000160  | 19.867609 | .           | 1.370000 | .        |
| McNaughton et al. 1989                   | temperate and tropical shrublands and forests | terrestrial | .            | 13.21169908 | .          | .         | 0.013483001 | .        | .        |
| McNaughton et al. 1989                   | temperate and tropical shrublands and forests | terrestrial | .            | 41.15399548 | .          | .         | 0.015895208 | .        | .        |
| McNaughton et al. 1989                   | temperate and tropical shrublands and forests | terrestrial | .            | 56.46689392 | .          | .         | 0.022091513 | .        | .        |
| McNaughton et al. 1989                   | temperate and tropical shrublands and forests | terrestrial | .            | 75.99143688 | .          | .         | 0.254805335 | .        | .        |
| McNaughton et al. 1989                   | temperate and tropical shrublands and forests | terrestrial | .            | 269.3346511 | .          | .         | 0.026663458 | .        | .        |
| McNaughton et al. 1989                   | temperate and tropical shrublands and forests | terrestrial | .            | 367.1727248 | .          | .         | 0.148370268 | .        | .        |
| McNaughton et al. 1989                   | temperate and tropical shrublands and forests | terrestrial | 1810.040000  | 615.414014  | .          | .         | 0.865366424 | .        | .        |
| McNaughton et al. 1989                   | temperate and tropical shrublands and forests | terrestrial | .            | 423.206256  | .          | .         | 0.668151443 | .        | .        |
| McNaughton et al. 1989                   | temperate and tropical shrublands and forests | terrestrial | .            | 326.8914747 | .          | .         | 1.260613775 | .        | .        |
| McNaughton et al. 1989                   | temperate and tropical shrublands and forests | terrestrial | .            | 210.7420355 | .          | .         | 2.164929131 | .        | .        |
| McNaughton et al. 1989                   | temperate and tropical shrublands and forests | terrestrial | .            | 232.1704014 | .          | .         | 1.290605239 | .        | .        |
| McNaughton et al. 1989                   | temperate and tropical shrublands and forests | terrestrial | .            | 250.8715411 | .          | .         | 0.427423874 | .        | .        |
| Menhinick 1967                           | temperate and tropical shrublands and forests | terrestrial | .            | 221.920000  | 2.029400   | 0.914474  | 0.515881294 | .        | .        |
| Nielsen 1978                             | temperate and tropical shrublands and forests | terrestrial | 100.400000   | 114.610000  | 3.478450   | 3.035032  | .           | .        | .        |
| Ohmart et al. 1983                       | temperate and tropical shrublands and forests | terrestrial | 194.000000   | 74.095000   | 1.241000   | 1.674877  | .           | 0.530000 | 0.034000 |
| Ohmart et al. 1983                       | temperate and tropical shrublands and forests | terrestrial | 145.200000   | 65.335000   | 1.281150   | 1.960894  | .           | 0.570000 | 0.025100 |
| Ohmart et al. 1983                       | temperate and tropical shrublands and forests | terrestrial | 200.000000   | 89.060000   | 2.120650   | 2.381148  | .           | 0.580000 | 0.053700 |
| Proctor et al. 1983                      | temperate and tropical shrublands and forests | terrestrial | 1520.000000  | 332.880000  | 40.880000  | 12.280702 | .           | 1.170000 | .        |
| Proctor et al. 1983                      | temperate and tropical shrublands and forests | terrestrial | 1880.000000  | 264.260000  | 40.880000  | 15.469613 | .           | 0.567000 | .        |
| Proctor et al. 1983                      | temperate and tropical shrublands and forests | terrestrial | 1000.000000  | 318.280000  | 54.020000  | 16.972477 | .           | 0.900000 | .        |
| Proctor et al. 1983                      | temperate and tropical shrublands and forests | terrestrial | 2600.000000  | 246.740000  | 30.660000  | 12.426036 | .           | 0.950000 | .        |
| Reichle and Crossley 1967                | temperate and tropical shrublands and forests | terrestrial | 40.000000    | 89.790000   | 7.993500   | 8.902439  | .           | .        | .        |
| Reichle et al. 1973                      | temperate and tropical shrublands and forests | terrestrial | .            | 327.868000  | 3.600000   | 1.098003  | .           | 0.338900 | 0.061900 |
| Schowalter et al. 1981                   | temperate and tropical shrublands and forests | terrestrial | .            | 127.998200  | 8.000070   | 6.250143  | 0.166879795 | .        | .        |
| Soholt 1973                              | temperate and tropical shrublands and forests | terrestrial | .            | 13.542960   | 0.934473   | 6.900065  | .           | .        | .        |
| Svensson and Roswall 1980                | temperate and tropical shrublands and forests | terrestrial | 196.800000   | 56.940000   | 0.361350   | 0.634615  | .           | .        | .        |
| Tanner 1980                              | temperate and tropical shrublands and forests | terrestrial | 315.294118   | 195.640000  | .          | .         | .           | 1.050000 | 0.050000 |
| Van Cleve et al. 1981                    | temperate and tropical shrublands and forests | terrestrial | 927.152318   | 51.100000   | .          | .         | .           | 0.390000 | 0.083300 |
| Van Cleve et al. 1981                    | temperate and tropical shrublands and forests | terrestrial | 597.727273   | 28.798500   | .          | .         | .           | 0.210000 | 0.033000 |
| Van Cleve et al. 1983                    | temperate and tropical shrublands and forests | terrestrial | 4478.856462  | 188.000000  | .          | .         | .           | 0.250000 | 0.025600 |
| Van Cleve et al. 1983                    | temperate and tropical shrublands and forests | terrestrial | 4422.700587  | 226.000000  | .          | .         | .           | 0.240000 | 0.024500 |
| Van Cleve et al. 1983                    | temperate and tropical shrublands and forests | terrestrial | 6975.580703  | 146.400000  | .          | .         | .           | 0.140000 | 0.017700 |
| Van Cleve et al. 1983                    | temperate and tropical shrublands and forests | terrestrial | 2036.770007  | 45.200000   | .          | .         | .           | 0.240000 | 0.036000 |
| Van Cleve et al. 1983                    | temperate and tropical shrublands and forests | terrestrial | 4839.452055  | 220.800000  | .          | .         | .           | 0.210000 | 0.026800 |
| Varley 1970                              | temperate and tropical shrublands and forests | terrestrial | .            | 496         | .          | .         | .           | 0.73     | .        |
| Whittaker 1975                           | temperate and tropical shrublands and forests | terrestrial | 164.000000   | 157.680000  | 12.665500  | 8.032407  | .           | .        | .        |
| Whittaker and Woodwell 1969              | temperate and tropical shrublands and forests | terrestrial | .            | 342.800700  | 9.719950   | 2.835452  | .           | .        | .        |
| Aerts 1989                               | temperate and tropical grasslands             | terrestrial | 80.000000    | 216.080000  | .          | .         | .           | 0.955000 | 0.035000 |
| Aerts et al. 1992                        | temperate and tropical grasslands             | terrestrial | 40.645161    | 45.990000   | .          | .         | .           | 0.700000 | 0.125000 |
| Aerts et al. 1992                        | temperate and tropical grasslands             | terrestrial | 38.194444    | 40.150000   | .          | .         | .           | 1.400000 | 0.050000 |
| Auclair et al. 1976                      | temperate and tropical grasslands             | terrestrial | 322.800000   | 327.999950  | .          | .         | .           | .        | .        |
| Boyer and Wheeler 1989                   | temperate and tropical grasslands             | terrestrial | 64.770932    | 149.650000  | .          | .         | .           | 1.200000 | 0.700000 |
| Boyer and Wheeler 1989                   | temperate and tropical grasslands             | terrestrial | 150.931677   | 88.695000   | .          | .         | .           | 0.940000 | 0.400000 |
| Collins and Steinauer 1998, unpubl. Data | temperate and tropical grasslands             | terrestrial | 91.458       | 182.916     | .          | .         | .           | 1.32     | .        |
| Coppock et al. 1983                      | temperate and tropical grasslands             | terrestrial | 32.000000    | 76.650000   | 36.500000  | 47.619048 | .           | 2.230000 | .        |
| Damman 1978                              | temperate and tropical grasslands             | terrestrial | 52.009132    | 41.573500   | .          | .         | .           | 0.980000 | 0.084000 |
| Damman 1978                              | temperate and tropical grasslands             | terrestrial | 38.059701    | 37.230000   | .          | .         | .           | 0.410000 | 0.035000 |
| Day and Detling 1990                     | temperate and tropical grasslands             | terrestrial | .            | 56.246500   | 7.318250   | 13.011032 | .           | 1.080000 | .        |
| Edroma 1984                              | temperate and tropical grasslands             | terrestrial | .            | 190.000750  | 46.000950  | 24.210931 | .           | .        | .        |
| Frank and McNaughton 1992                | temperate and tropical grasslands             | terrestrial | .            | 120.997500  | 54.458000  | 45.007541 | .           | 2.100000 | .        |
| Gandar 1982                              | temperate and tropical grasslands             | terrestrial | 8.650000     | 30.660000   | 12.994000  | 42.380952 | .           | .        | .        |
| Gandar 1982                              | temperate and tropical grasslands             | terrestrial | 6.400000     | 17.520000   | 4.336200   | 24.750000 | .           | .        | .        |
| Lock 1972                                | temperate and tropical grasslands             | terrestrial | .            | 200.921550  | 56.921750  | 28.330336 | .           | .        | .        |
| McNaughton 1985                          | temperate and tropical grasslands             | terrestrial | 33.470000    | 265.720000  | 175.200000 | 65.934066 | 0.733       | 1.470000 | 0.373000 |
| McNaughton 1985                          | temperate and tropical grasslands             | terrestrial | 40.000000    | 328.000000  | 248.000000 | 75.609756 | 0.849       | 2.520000 | 0.444000 |
| McNaughton et al. 1989                   | temperate and tropical grasslands             | terrestrial | .            | 62.61138244 | .          | .         | 0.023706072 | .        | .        |
| McNaughton et al. 1989                   | temperate and tropical grasslands             | terrestrial | .            | 43.89844399 | .          | .         | 0.106754852 | .        | .        |
| McNaughton et al. 1989                   | temperate and tropical grasslands             | terrestrial | .            | 172.5186675 | .          | .         | 0.120072762 | .        | .        |

|                               |                                   |             |              |             |            |           |             |             |          |          |
|-------------------------------|-----------------------------------|-------------|--------------|-------------|------------|-----------|-------------|-------------|----------|----------|
| McNaughton et al. 1989        | temperate and tropical grasslands | terrestrial | .            | 103.5959644 | .          | .         | .           | 0.17491478  | .        | .        |
| McNaughton et al. 1989        | temperate and tropical grasslands | terrestrial | .            | 105.6218997 | .          | .         | .           | 0.226543517 | .        | .        |
| McNaughton et al. 1989        | temperate and tropical grasslands | terrestrial | .            | 136.7421673 | .          | .         | .           | 0.580238655 | .        | .        |
| McNaughton et al. 1989        | temperate and tropical grasslands | terrestrial | 427.590091   | 611.4538298 | .          | .         | .           | 3.989692704 | .        | .        |
| McNaughton et al. 1989        | temperate and tropical grasslands | terrestrial | 363.860431   | 520.3204158 | .          | .         | .           | 3.989692704 | .        | .        |
| McNaughton et al. 1989        | temperate and tropical grasslands | terrestrial | .            | 324.7879307 | .          | .         | .           | 0.540720122 | .        | .        |
| McNaughton et al. 1989        | temperate and tropical grasslands | terrestrial | .            | 306.4548318 | .          | .         | .           | 0.608176183 | .        | .        |
| McNaughton et al. 1989        | temperate and tropical grasslands | terrestrial | .            | 469.2577704 | .          | .         | .           | 1.451611169 | .        | .        |
| McNaughton et al. 1989        | temperate and tropical grasslands | terrestrial | .            | 428.7059422 | .          | .         | .           | 1.35274574  | .        | .        |
| McNaughton et al. 1989        | temperate and tropical grasslands | terrestrial | .            | 396.7481933 | .          | .         | .           | 1.174756677 | .        | .        |
| McNaughton et al. 1989        | temperate and tropical grasslands | terrestrial | .            | 371.9442393 | .          | .         | .           | 1.321310236 | .        | .        |
| McNaughton et al. 1989        | temperate and tropical grasslands | terrestrial | .            | 287.2958496 | .          | .         | .           | 1.020186728 | .        | .        |
| McNaughton et al. 1989        | temperate and tropical grasslands | terrestrial | .            | 255.7776153 | .          | .         | .           | 0.825614459 | .        | .        |
| McNaughton et al. 1989        | temperate and tropical grasslands | terrestrial | .            | 196.2954971 | .          | .         | .           | 0.825614459 | .        | .        |
| McNaughton et al. 1989        | temperate and tropical grasslands | terrestrial | .            | 250.8715411 | .          | .         | .           | 1.451611169 | .        | .        |
| McNaughton et al. 1989        | temperate and tropical grasslands | terrestrial | .            | 212.106942  | .          | .         | .           | 1.120792384 | .        | .        |
| McNaughton et al. 1989        | temperate and tropical grasslands | terrestrial | .            | 212.106942  | .          | .         | .           | 0.354134121 | .        | .        |
| Pakarinen 1978                | temperate and tropical grasslands | terrestrial | 178.531073   | 115.340000  | .          | .         | .           | .           | 0.830000 | .        |
| Pakarinen 1978                | temperate and tropical grasslands | terrestrial | 132.911392   | 76.650000   | .          | .         | .           | .           | 0.700000 | 0.035000 |
| Ritchie, 1989-1999            | temperate and tropical grasslands | terrestrial | 17.74        | 35.48       | .          | .         | .           | 0.0996      | .        | .        |
| Ritchie et al. 1998           | temperate and tropical grasslands | terrestrial | .            | 99.999000   | 45.000850  | 45.001300 | .           | .           | 1.450000 | .        |
| Scott et al. 1979             | temperate and tropical grasslands | terrestrial | 85.030000    | 121.600000  | 9.320000   | 7.664474  | 0.216136885 | .           | 1.625000 | 0.180000 |
| Sinclair 1975                 | temperate and tropical grasslands | terrestrial | 116.560000   | 239.075000  | 65.700000  | 27.480916 | 0.337866414 | .           | 1.440000 | 0.220000 |
| Strugnell and Pigott 1978     | temperate and tropical grasslands | terrestrial | 98.520000    | 306.600000  | 164.250000 | 53.571429 | .           | .           | 1.600000 | .        |
| Thornton 1971                 | temperate and tropical grasslands | terrestrial | .            | 190.000750  | 46.000950  | 24.210931 | .           | .           | .        | .        |
| Van Hook 1971                 | temperate and tropical grasslands | terrestrial | 56.880000    | 127.385000  | 12.300500  | 9.656160  | 0.267073789 | .           | .        | .        |
| Whealer and Shaw 1991         | temperate and tropical grasslands | terrestrial | 56.000000    | 87.965000   | .          | .         | .           | .           | .        | .        |
| Whealer and Shaw 1991         | temperate and tropical grasslands | terrestrial | 132.000000   | 140.160000  | .          | .         | .           | .           | .        | .        |
| Whealer and Shaw 1991         | temperate and tropical grasslands | terrestrial | 240.000000   | 500.050000  | .          | .         | .           | .           | .        | .        |
| Whealer and Shaw 1991         | temperate and tropical grasslands | terrestrial | 134.000000   | 247.835000  | .          | .         | .           | .           | .        | .        |
| Whealer and Shaw 1991         | temperate and tropical grasslands | terrestrial | 178.000000   | 368.650000  | .          | .         | .           | .           | .        | .        |
| Whealer and Shaw 1991         | temperate and tropical grasslands | terrestrial | 390.000000   | 700.800000  | .          | .         | .           | .           | .        | .        |
| Whealer and Shaw 1991         | temperate and tropical grasslands | terrestrial | 90.000000    | 100.010000  | .          | .         | .           | .           | .        | .        |
| Whealer and Shaw 1991         | temperate and tropical grasslands | terrestrial | 96.000000    | 100.010000  | .          | .         | .           | .           | .        | .        |
| Whealer and Shaw 1991         | temperate and tropical grasslands | terrestrial | 276.000000   | 540.200000  | .          | .         | .           | .           | .        | .        |
| Whealer and Shaw 1991         | temperate and tropical grasslands | terrestrial | 310.000000   | 598.600000  | .          | .         | .           | .           | .        | .        |
| Whealer and Shaw 1991         | temperate and tropical grasslands | terrestrial | 228.000000   | 267.910000  | .          | .         | .           | .           | .        | .        |
| Whealer and Shaw 1991         | temperate and tropical grasslands | terrestrial | 200.000000   | 278.130000  | .          | .         | .           | .           | .        | .        |
| Wiegert and Evans 1964        | temperate and tropical grasslands | terrestrial | 424.100000   | 594.950000  | 8.176000   | 1.374233  | .           | .           | .        | .        |
| Wiegert and Evans 1964        | temperate and tropical grasslands | terrestrial | 296.200000   | 199.509000  | 2.555000   | 1.280644  | .           | .           | .        | .        |
| Brown et al. 1984             | mangroves                         | terrestrial | 3073.193916  | 118.004500  | .          | .         | .           | .           | .        | .        |
| Christensen 1978              | mangroves                         | terrestrial | .            | 1080.400000 | 16.060000  | 1.486486  | .           | .           | .        | .        |
| Emmerson and McGwynne 1992    | mangroves                         | terrestrial | .            | 525.600000  | 29.200000  | 5.555556  | .           | .           | .        | .        |
| Flores-Verdugo et al. 1987    | mangroves                         | terrestrial | .            | 463.550000  | .          | .         | .           | .           | .        | .        |
| Golley et al. 1962            | mangroves                         | terrestrial | 1842.200000  | 1438.892050 | 36.500000  | 2.536674  | 1.000000    | .           | .        | .        |
| Johnstone 1981                | mangroves                         | terrestrial | .            | 1533.000000 | 33.580000  | 2.190476  | .           | .           | .        | .        |
| Lee 1989                      | mangroves                         | terrestrial | .            | 876.000000  | 47.450000  | 5.416667  | .           | .           | .        | .        |
| Li and Lee 1998               | mangroves                         | terrestrial | .            | 700.800000  | 26.207000  | 3.739583  | .           | .           | .        | .        |
| Li and Lee 1998               | mangroves                         | terrestrial | .            | 868.700000  | 27.995500  | 3.222689  | .           | .           | .        | .        |
| Nessel 1978                   | mangroves                         | terrestrial | 11370.967742 | 514.650000  | .          | .         | .           | .           | .        | 0.013900 |
| Odum 1971                     | mangroves                         | terrestrial | .            | 900.017000  | 23.039530  | 2.559899  | .           | .           | .        | .        |
| Omuf et al. 1977              | mangroves                         | terrestrial | .            | 1694.151150 | 105.850000 | 6.247967  | .           | .           | .        | .        |
| Onq 1993                      | mangroves                         | terrestrial | .            | 900.017000  | .          | .         | .           | .           | .        | .        |
| Onq et al. 1982               | mangroves                         | terrestrial | .            | .           | .          | .         | .           | .           | 0.655000 | .        |
| Robertson and Daniel 1989     | mangroves                         | terrestrial | .            | 599.987000  | 15.800120  | 2.633410  | .           | .           | .        | .        |
| Schlesinger 1978              | mangroves                         | terrestrial | 12285.251216 | 276.670000  | .          | .         | .           | .           | 0.330000 | 0.014900 |
| Twilley et al. 1986           | mangroves                         | terrestrial | 6800.000000  | 199.311900  | .          | .         | .           | .           | .        | .        |
| Twilley et al. 1986           | mangroves                         | terrestrial | 6544.000000  | 118.887800  | .          | .         | .           | .           | .        | .        |
| Twilley et al. 1986           | mangroves                         | terrestrial | 4460.000000  | 181.828400  | .          | .         | .           | .           | .        | .        |
| Van der Walk and Attwill 1984 | mangroves                         | terrestrial | .            | 104.901000  | .          | .         | .           | .           | .        | .        |
| Wolff et al. 2000             | mangroves                         | terrestrial | .            | 507.000000  | 13.500000  | 2.662722  | .           | 0.981875    | 0.060650 | .        |



# Supporting Information: Data Set for Figure 2 in Main Text

| system | ref                                        | herbivore ID           | herbivore ID2 | common name group | Nh         | N max       | N min      | N SD       | Ph         | P max      | P min      | P SD       | study mean h | study mean h N source | P source          | notes                                            |                                                                 |
|--------|--------------------------------------------|------------------------|---------------|-------------------|------------|-------------|------------|------------|------------|------------|------------|------------|--------------|-----------------------|-------------------|--------------------------------------------------|-----------------------------------------------------------------|
|        | 1 Baird and Ulanowicz 1989                 |                        |               | oysters           | 9.39       |             |            |            | 0.084      |            |            |            |              |                       |                   |                                                  |                                                                 |
|        | 1 Baird and Ulanowicz 1989                 | Mya                    | arenaria      | invertebrate      | 10.7       |             |            |            | 0.084      |            |            |            |              |                       |                   | up to trophic position 2.5, used abalone         |                                                                 |
|        | 2 Baird and Ulanowicz 1989                 |                        |               | zooplankton       | 7.73213148 |             |            |            | 0.82336711 |            |            |            |              |                       |                   | up to trophic position 2.5, used average copepod |                                                                 |
|        | 53 Baird and Ular Kromme                   | zooplankton            |               | invertebrate      | 7.73213148 |             |            |            | 0.82336711 |            |            |            |              |                       |                   |                                                  |                                                                 |
|        | 54 Baird and Ular Ythan                    | zooplankton            |               | invertebrate      | 7.73213148 |             |            |            | 0.82336711 |            |            |            |              |                       |                   |                                                  |                                                                 |
|        | 55 Baird and Ular Emis                     | zooplankton            |               | invertebrate      | 7.73213148 |             |            |            | 0.82336711 |            |            |            |              |                       |                   |                                                  |                                                                 |
|        | 56 Baird and Ular Swartkops                | zooplankton            |               | invertebrate      | 7.73213148 |             |            |            | 0.82336711 |            |            |            |              |                       |                   |                                                  |                                                                 |
|        | 57 Baird and Ular Emis                     | benthos                |               | invertebrate      | 10.045     |             |            |            | 1.01       |            |            |            |              |                       |                   |                                                  |                                                                 |
|        | 58 Baird and Ular Ythan                    | benthos                |               | invertebrate      | 10.045     |             |            |            | 1.01       |            |            |            |              |                       |                   |                                                  |                                                                 |
|        | 59 Baird and Ular Swartkops                | benthos                |               | invertebrate      | 10.045     |             |            |            | 1.01       |            |            |            |              |                       |                   |                                                  |                                                                 |
|        | 60 Baird and Ular Kromme                   | benthos                |               | invertebrate      | 10.045     |             |            |            | 1.01       |            |            |            |              |                       |                   |                                                  |                                                                 |
|        | 3 Billings 1987                            |                        |               | leminings         | 11.6       |             |            |            | 2.76       |            |            |            |              |                       |                   | Hayssen91 d. Hayssen91 d. microps                |                                                                 |
|        | 61 Bliss 1975                              |                        |               | snow geese        | bird       |             |            |            | 3.43       |            |            |            |              |                       |                   | Dierenfeld07 r. Gillooly&Allen05 rabbit          |                                                                 |
|        | 61 Bliss 1975                              |                        |               | arctic hare       | mammal     | 11.3        |            |            | 2.88       |            |            |            |              |                       |                   | Dierenfeld07 r. Gillooly&Allen05 rabbit          |                                                                 |
|        | 61 Bliss 1975                              |                        |               | collared lemming  | mammal     | 11.6        |            |            | 2.76       |            |            |            |              |                       |                   | Hayssen91 d. Hayssen91 d. microps                |                                                                 |
|        | 61 Bliss 1975                              |                        |               | muskox            | mammal     | 9.6         |            |            | 2.88       |            |            |            |              |                       |                   | Dierenfeld07 r. Gillooly&Allen05 bull            |                                                                 |
|        | 62 Bliss 1975                              |                        |               | snow geese        | bird       |             |            |            | 3.43       |            |            |            |              |                       |                   | Dierenfeld07 r. Gillooly&Allen05 rabbit          |                                                                 |
|        | 62 Bliss 1975                              |                        |               | arctic hare       | mammal     | 11.3        |            |            | 2.88       |            |            |            |              |                       |                   | Hayssen91 d. Hayssen91 d. microps                |                                                                 |
|        | 62 Bliss 1975                              |                        |               | collared lemming  | mammal     | 11.6        |            |            | 2.76       |            |            |            |              |                       |                   | Dierenfeld07 r. Gillooly&Allen05 rabbit          |                                                                 |
|        | 62 Bliss 1975                              |                        |               | muskox            | mammal     | 9.6         |            |            | 2.88       |            |            |            |              |                       |                   | Dierenfeld07 r. Gillooly&Allen05 bull            |                                                                 |
|        | 4 Brown et al 1991                         | Clausocalanus furcatus |               | copepod           | 7.73213148 | 11.11111111 | 4.02298851 | 1.93306673 | 0.82336711 | 1.64021164 | 0.29693487 | 0.29184236 | 7.69707304   | 0.85634546            |                   | S Afr J Mar Sci 11: 537                          |                                                                 |
|        | 4 Brown et al 1991                         | Corycaella             | cinconia      | protozoan         | 6.99943452 | 8.61230329  | 5.4919608  | 0.80682275 | 1.2991027  | 2.5833333  | 0.4434907  | 0.62454483 | 7.69707304   | 0.85634546            |                   | S Afr J Mar Sci 11: 537                          |                                                                 |
|        | 4 Brown et al 1991                         | Temora                 | discaudata    | copepod           | 7.73213148 | 11.11111111 | 4.02298851 | 1.93306673 | 0.82336711 | 1.64021164 | 0.29693487 | 0.29184236 | 7.69707304   | 0.85634546            |                   | S Afr J Mar Sci 11: 537                          |                                                                 |
|        | 4 Brown et al 1991                         | Calanus                | finmarchicus  | copepod           | 7.73213148 | 11.11111111 | 4.02298851 | 1.93306673 | 0.82336711 | 1.64021164 | 0.29693487 | 0.29184236 | 7.69707304   | 0.85634546            |                   | S Afr J Mar Sci 11: 537                          |                                                                 |
|        | 4 Brown et al 1991                         | Euterpina              | acutifrons    | copepod           | 7.73213148 | 11.11111111 | 4.02298851 | 1.93306673 | 0.82336711 | 1.64021164 | 0.29693487 | 0.29184236 | 7.69707304   | 0.85634546            |                   | S Afr J Mar Sci 11: 537                          |                                                                 |
|        | 4 Brown et al 1991                         | Temora                 | turbinata     | copepod           | 7.73213148 | 11.11111111 | 4.02298851 | 1.93306673 | 0.82336711 | 1.64021164 | 0.29693487 | 0.29184236 | 7.69707304   | 0.85634546            |                   | S Afr J Mar Sci 11: 537                          |                                                                 |
|        | 4 Brown et al 1991                         | Pseudodiaptomus        | nodus         | copepod           | 7.73213148 | 11.11111111 | 4.02298851 | 1.93306673 | 0.82336711 | 1.64021164 | 0.29693487 | 0.29184236 | 7.69707304   | 0.85634546            |                   | S Afr J Mar Sci 11: 537                          |                                                                 |
|        | 4 Brown et al 1991                         | Calocalanus            | tenous        | copepod           | 7.73213148 | 11.11111111 | 4.02298851 | 1.93306673 | 0.82336711 | 1.64021164 | 0.29693487 | 0.29184236 | 7.69707304   | 0.85634546            |                   | S Afr J Mar Sci 11: 537                          |                                                                 |
|        | 4 Brown et al 1991                         | Centropages            | brachiacus    | copepod           | 7.90389332 | 9.19320268  | 6.76328502 | 0.85719415 | 0.8847793  | 1.17424242 | 0.7380924  | 0.2518097  | 7.69707304   | 0.85634546            |                   | S Afr J Mar Sci 11: 537                          |                                                                 |
|        | 4 Brown et al 1991                         | Calanus                | cinconia      | copepod           | 7.73213148 | 11.11111111 | 4.02298851 | 1.93306673 | 0.82336711 | 1.64021164 | 0.29693487 | 0.29184236 | 7.69707304   | 0.85634546            |                   | S Afr J Mar Sci 11: 537                          |                                                                 |
|        | 4 Brown et al 1991                         | Metridia               | lucens        | copepod           | 7.73213148 | 11.11111111 | 4.02298851 | 1.93306673 | 0.82336711 | 1.64021164 | 0.29693487 | 0.29184236 | 7.69707304   | 0.85634546            |                   | S Afr J Mar Sci 11: 537                          |                                                                 |
|        | 4 Brown et al 1991                         | Nannocalanus           | minor         | copepod           | 7.73213148 | 11.11111111 | 4.02298851 | 1.93306673 | 0.82336711 | 1.64021164 | 0.29693487 | 0.29184236 | 7.69707304   | 0.85634546            |                   | S Afr J Mar Sci 11: 537                          |                                                                 |
|        | 4 Brown et al 1991                         | Clausocalanus          | arcuicornis   | copepod           | 7.73213148 | 11.11111111 | 4.02298851 | 1.93306673 | 0.82336711 | 1.64021164 | 0.29693487 | 0.29184236 | 7.69707304   | 0.85634546            |                   | S Afr J Mar Sci 11: 537                          |                                                                 |
|        | 4 Brown et al 1991                         | Paracalanus            | parvus        | copepod           | 7.73213148 | 11.11111111 | 4.02298851 | 1.93306673 | 0.82336711 | 1.64021164 | 0.29693487 | 0.29184236 | 7.69707304   | 0.85634546            |                   | S Afr J Mar Sci 11: 537                          |                                                                 |
|        | 4 Brown et al 1991                         | Paracalanus            | crassirostris | copepod           | 7.73213148 | 11.11111111 | 4.02298851 | 1.93306673 | 0.82336711 | 1.64021164 | 0.29693487 | 0.29184236 | 7.69707304   | 0.85634546            |                   | S Afr J Mar Sci 11: 537                          |                                                                 |
|        | 4 Brown et al 1991                         | Brachionus             | varius        | copepod           | 7.73213148 | 11.11111111 | 4.02298851 | 1.93306673 | 0.82336711 | 1.64021164 | 0.29693487 | 0.29184236 | 7.69707304   | 0.85634546            |                   | S Afr J Mar Sci 11: 537                          |                                                                 |
|        | 5 Bustamante et al. 1995                   | Patella                | granularis    | patellid limpet   | 12.138     |             |            |            | 0.436677   |            |            |            |              |                       |                   | Used chiton value, which is anomalously low      |                                                                 |
|        | 6 Cammen 1980                              | Nereis                 | succinea      | polychaete        | 10.57      |             |            |            | 0.281827   |            |            |            |              |                       |                   | Used Tritochota sponge value                     |                                                                 |
|        | 7 Chapin et al 1980                        | leminings              |               | mammal            | 11.6       |             |            |            | 2.76       |            |            |            |              |                       |                   |                                                  |                                                                 |
|        | 8 Chew and Chew 1970                       | Dipodomys              | merriami      | rodents           | mammal     | 11.6        |            |            | 2.76       |            |            |            |              |                       |                   |                                                  |                                                                 |
|        | 8 Chew and Chew 1970                       | Onychomys              | torturus      | rodents           | mammal     | 11.6        |            |            | 2.76       |            |            |            |              |                       |                   |                                                  |                                                                 |
|        | 8 Chew and Chew 1970                       | Lepus                  | californicus  | rodents           | mammal     | 11.6        |            |            | 2.76       |            |            |            |              |                       |                   |                                                  |                                                                 |
|        | 8 Chew and Chew 1970                       | Peromyscus             | eremicus      | rodents           | mammal     | 11.6        |            |            | 2.76       |            |            |            |              |                       |                   |                                                  |                                                                 |
|        | 8 Chew and Chew 1970                       | Ammospermophilus       | harrisi       | rodents           | mammal     | 11.6        |            |            | 2.76       |            |            |            |              |                       |                   |                                                  |                                                                 |
|        | 8 Chew and Chew 1970                       | Spermophilus           | spilosoma     | rodents           | mammal     | 11.6        |            |            | 2.76       |            |            |            |              |                       |                   |                                                  |                                                                 |
|        | 8 Chew and Chew 1970                       | Sylvilagus             | auduboni      | rodents           | mammal     | 11.6        |            |            | 2.76       |            |            |            |              |                       |                   |                                                  |                                                                 |
|        | 8 Chew and Chew 1970                       | Peromyscus             | flavus        | rodents           | mammal     | 11.6        |            |            | 2.76       |            |            |            |              |                       |                   |                                                  |                                                                 |
|        | 8 Chew and Chew 1970                       | Peromyscus             | maniculatus   | rodents           | mammal     | 11.6        |            |            | 2.76       |            |            |            |              |                       |                   |                                                  |                                                                 |
|        | 8 Chew and Chew 1970                       | Reithrodontomys        | megakotis     | rodents           | mammal     | 11.6        |            |            | 2.76       |            |            |            |              |                       |                   |                                                  |                                                                 |
|        | 8 Chew and Chew 1970                       | Neotoma                | albigula      | rodents           | mammal     | 11.6        |            |            | 2.76       |            |            |            |              |                       |                   |                                                  |                                                                 |
|        | 8 Chew and Chew 1970                       | Perognathus            | balleyi       | rodents           | mammal     | 11.6        |            |            | 2.76       |            |            |            |              |                       |                   |                                                  |                                                                 |
|        | 8 Chew and Chew 1970                       | Perognathus            | penicillatus  | rodents           | mammal     | 11.6        |            |            | 2.76       |            |            |            |              |                       |                   |                                                  |                                                                 |
|        | 9 Collins and Steinauer 1998, unpubl. data |                        |               |                   |            |             |            |            |            |            |            |            |              |                       |                   |                                                  |                                                                 |
|        | 10 Coveney et al. 1977                     | Daphnia                | pulex         | zooplankton       | fw zoop    | 8.46817631  | 9.92       | 7.06833333 | 0.79453088 | 1.19122024 | 1.55       | 0.81       | 0.2187079    | 9.18964371            | 0.97977679        |                                                  | From a sample of 12 Daphnia species from different publications |
|        | 10 Coveney et al. 1977                     | Eudiaptomus            | graciloides   | zooplankton       | fw zoop    | 9.91111111  | 11.1       | 6.9        | 1.58137306 | 0.82336711 | 1.07       | 0.45       | 0.2402013    | 9.18964371            | 0.97977679        |                                                  | From a sample of 6 calanoid species from different publications |
|        | 63 Cyr and Pace 1993a                      | Daphnia                | pulex         | zooplankton       | fw zoop    | 8.25        | 9.92       | 7.06833333 | 1.4872299  | 1.01571428 | 1.17714286 | 0.81       | 0.18735303   | 9.42555556            | 1.21156085        | Elser et al. 2000                                | Elser et al. 2000                                               |
|        | 63 Cyr and Pace 1993a                      | Ceriodaphnia           | reticulata    | zooplankton       | fw zoop    | 8.7         | 8.7        | 8.7        | 0.205      | 2.05       | 2.05       | 0.0        | 9.42555556   | 1.21156085            | Elser et al. 2000 | Elser et al. 2000                                |                                                                 |
|        | 63 Cyr and Pace 1993a                      | Daphnia                | longispina    | zooplankton       | fw zoop    | 9.25        | 9.25       | 9.25       | 0.615      | 1.51       | 1.51       | 0.0        | 9.42555556   | 1.21156085            | Elser et al. 2000 | Elser et al. 2000                                |                                                                 |
|        | 63 Cyr and Pace 1993a                      | Bosmina                | longirostris  | zooplankton       | fw zoop    | 8.815       | 8.815      | 8.815      | 0.615      | 1.615      | 1.615      | 0.0        | 9.42555556   | 1.21156085            | Elser et al. 2000 | Elser et al. 2000                                |                                                                 |
|        | 63 Cyr and Pace 1993b                      | Daphnia                | pulex         | zooplankton       | fw zoop    | 9.8         | 10         | 9.6        | 0.28284271 | 1.085      | 1.22       | 0.95       | 0.19091883   | 9.42555556            | 1.21156085        | Elser et al. 2000                                | Elser et al. 2000                                               |
|        | 63 Cyr and Pace 1993b                      | Daphnia                | longispina    | zooplankton       | fw zoop    | 8.815       | 8.815      | 8.815      | 0.615      | 1.615      | 1.615      | 0.0        | 9.42555556   | 1.21156085            | Elser et al. 2000 | Elser et al. 2000                                |                                                                 |
|        | 63 Cyr and Pace 1993b                      | Ceriodaphnia           | reticulata    | zooplankton       | fw zoop    | 8.7         | 8.7        | 8.7        | 0.205      | 2.05       | 2.05       | 0.0        | 9.42555556   | 1.21156085            | Elser et al. 2000 | Elser et al. 2000                                |                                                                 |
|        | 63 Cyr and Pace 1993b                      | Mesocyclops            | leuckarti     | copepod           | fw zoop    | 10.15       | 10.4       | 9.9        | 0.35355339 | 0.905      | 1.16       | 0.65       | 0.36062446   | 9.42555556            | 1.21156085        | Elser et al. 2000                                | Elser et al. 2000                                               |
|        | 63 Cyr and Pace 1993b                      | Brachionus             | varius        | copepod           | fw zoop    | 12.35       | 12.4       | 12.3       | 0.07071068 | 1.05833333 | 1.05833333 | 0.0        | 9.42555556   | 1.21156085            | Elser et al. 2000 | Elser et al. 2000                                |                                                                 |
|        | 64 Cyr and Pace 1993a                      | Daphnia                | pulex         | zooplankton       | fw zoop    | 8.25        | 9.92       | 7.06833333 | 1.4872299  | 1.01571428 | 1.17714286 | 0.81       | 0.18735303   | 9.42555556            | 1.21156085        | Elser et al. 2000                                | Elser et al. 2000                                               |
|        | 64 Cyr and Pace 1993a                      | Ceriodaphnia           | reticulata    | zooplankton       | fw zoop    | 8.7         | 8.7        | 8.7        | 0.205      | 2.05       | 2.05       | 0.0        | 9.42555556   | 1.21156085            | Elser et al. 2000 | Elser et al. 2000                                |                                                                 |
|        | 64 Cyr and Pace 1993a                      | Daphnia                | longispina    | zooplankton       | fw zoop    | 9.25        | 9.25       | 9.25       | 0.615      | 1.51       | 1.51       | 0.0        | 9.42555556   | 1.21156085            | Elser et al. 2000 | Elser et al. 2000                                |                                                                 |
|        | 64 Cyr and Pace 1993a                      | Bosmina                | longirostris  | zooplankton       | fw zoop    | 8.815       | 8.815      | 8.815      | 0.615      | 1.615      | 1.615      | 0.0        | 9.42555556   | 1.21156085            | Elser et al. 2000 | Elser et al. 2000                                |                                                                 |
|        | 64 Cyr and Pace 1993b                      | Daphnia                | pulex         | zooplankton       | fw zoop    | 9.8         | 10         | 9.6        | 0.28284271 | 1.085      | 1.22       | 0.95       | 0.19091883   | 9.42555556            | 1.21156085        | Elser et al. 2000                                | Elser et al. 2000                                               |
|        | 64 Cyr and Pace 1993b                      | Daphnia                | longispina    | zooplankton       | fw zoop    | 8.815       | 8.815      | 8.815      | 0.615      | 1.615      | 1.615      | 0.0        | 9.42555556   | 1.21156085            |                   |                                                  |                                                                 |



|    |                   |               |               |                |          |            |             |            |            |            |            |            |            |  |  |  |  |  |  |  |               |                   |                      |                  |                 |                    |
|----|-------------------|---------------|---------------|----------------|----------|------------|-------------|------------|------------|------------|------------|------------|------------|--|--|--|--|--|--|--|---------------|-------------------|----------------------|------------------|-----------------|--------------------|
| 47 | Scott et al. 1979 | Curculionidae | .             | Insects        | Insects  | 9.8565     |             |            | 0.77428    | 0.5425     |            |            |            |  |  |  |  |  |  |  | Faen curculio | Fagan curculionid |                      |                  |                 |                    |
| 47 | Scott et al. 1979 | Tenebrionidae | .             | Insects        | Insects  | 8          |             |            | 0.4243     | 1.345      |            |            |            |  |  |  |  |  |  |  |               | Faen tenebric     | Fagan tenebrionid    |                  |                 |                    |
| 47 | Scott et al. 1979 | Carabidae     | .             | Insects        | Insects  |            |             |            |            |            |            |            |            |  |  |  |  |  |  |  |               |                   |                      |                  |                 |                    |
| 47 | Scott et al. 1979 | Lepidoptera   | .             | larvae         | Insects  | 8.564      |             |            | 1.0937     | 0.9347     |            |            |            |  |  |  |  |  |  |  |               | Faen leiidoo      | Fagan lepidoptera    |                  |                 |                    |
| 48 | Sinclair 1975     | Connochaetes  | taurinus      | nematodes      | invert   | 8.232      |             |            |            | 0.272536   |            |            |            |  |  |  |  |  |  |  |               | Hatcher, ascid    | Hatcher, ascidians   |                  |                 |                    |
| 48 | Sinclair 1975     | Equus         | burchelli     | wildebeest     | mammal   | 9.6        |             |            |            | 2.88       |            |            |            |  |  |  |  |  |  |  |               | Dierenfeld07 t    | Gilooly&Allen05 bull |                  |                 |                    |
| 48 | Sinclair 1975     | Gazella       | thomsonii     |                | mammal   | 9.6        |             |            |            | 2.88       |            |            |            |  |  |  |  |  |  |  |               | Dierenfeld07 t    | Gilooly&Allen05 bull |                  |                 |                    |
| 48 | Sinclair 1975     | Taurotragus   | oryx          | eland          | mammal   | 9.6        |             |            |            | 2.88       |            |            |            |  |  |  |  |  |  |  |               | Dierenfeld07 t    | Gilooly&Allen05 bull |                  |                 |                    |
| 49 | Small et al. 1989 | copepods      | .             | mesozoop       | mar zoop | 7.73213148 | 11.11111111 | 4.02298851 | 1.93306673 | 0.82336711 | 1.64021164 | 0.29693487 | 0.29184236 |  |  |  |  |  |  |  |               |                   |                      |                  |                 |                    |
| 50 | Sorokin 1983      | Mugil         | cephalus      | fish           | fish     | 12.5       |             |            |            | 2.5        |            |            |            |  |  |  |  |  |  |  |               |                   |                      |                  |                 |                    |
| 50 | Sorokin 1983      | Mugil         | saliens       | fish           | fish     | 12.5       |             |            |            | 2.5        |            |            |            |  |  |  |  |  |  |  |               |                   |                      |                  |                 |                    |
| 50 | Sorokin 1983      | Caspiolosa    | .             | fish           | fish     | 12.5       |             |            |            | 2.5        |            |            |            |  |  |  |  |  |  |  |               |                   |                      |                  |                 |                    |
| 50 | Sorokin 1983      | Clupeonella   | .             | fish           | fish     | 12.5       |             |            |            | 2.5        |            |            |            |  |  |  |  |  |  |  |               |                   |                      |                  |                 |                    |
| 50 | Sorokin 1983      | Engraulis     | .             | fish           | fish     | 12.5       |             |            |            | 2.5        |            |            |            |  |  |  |  |  |  |  |               |                   |                      |                  |                 |                    |
| 50 | Sorokin 1983      | Sardinella    | .             | fish           | fish     | 12.5       |             |            |            | 2.5        |            |            |            |  |  |  |  |  |  |  |               |                   |                      |                  |                 |                    |
| 50 | Sorokin 1983      | Sprattus      | sprattus      | fish           | fish     | 12.5       |             |            |            | 2.5        |            |            |            |  |  |  |  |  |  |  |               |                   |                      |                  |                 |                    |
| 50 | Sorokin 1983      | Syngnathus    | schmidti      | fish           | fish     | 12.5       |             |            |            | 2.5        |            |            |            |  |  |  |  |  |  |  |               |                   |                      |                  |                 |                    |
| 50 | Sorokin 1983      | Oikopleura    | .             | zooplankton    | mar zoop | 2.8072     | 4.93        | 1.314      | 1.49286811 | 0.1305     | 0.15       | 0.111      | 0.02757716 |  |  |  |  |  |  |  |               |                   |                      |                  |                 |                    |
| 50 | Sorokin 1983      | Penilia       | .             | zooplankton    | mar zoop | 8.46817631 | 9.92        | 7.06833333 | 0.79453088 | 1.19122024 | 1.55       | 0.81       | 0.21287079 |  |  |  |  |  |  |  |               |                   |                      |                  |                 |                    |
| 50 | Sorokin 1983      | Paracalanus   | .             | zooplankton    | mar zoop | 7.73213148 | 11.11111111 | 4.02298851 | 1.93306673 | 0.82336711 | 1.64021164 | 0.29693487 | 0.29184236 |  |  |  |  |  |  |  |               |                   | used average         | marine calanoid  |                 |                    |
| 50 | Sorokin 1983      | Calanus       | helgolandicus | zooplankton    | mar zoop | 7.73213148 | 11.11111111 | 4.02298851 | 1.93306673 | 0.82336711 | 1.64021164 | 0.29693487 | 0.29184236 |  |  |  |  |  |  |  |               |                   | used average         | marine calanoid  |                 |                    |
| 50 | Sorokin 1983      | Pseudocalanus | elongatus     | zooplankton    | mar zoop | 7.73213148 | 11.11111111 | 4.02298851 | 1.93306673 | 0.82336711 | 1.64021164 | 0.29693487 | 0.29184236 |  |  |  |  |  |  |  |               |                   | used average         | marine calanoid  |                 |                    |
| 50 | Sorokin 1983      | Centrocaepus  | .             | copepods       | mar zoop | 7.90389332 | 9.1503268   | 6.76288502 | 0.85719415 | 0.88347763 | 1.17424242 | 0.73809524 | 0.2518097  |  |  |  |  |  |  |  |               |                   |                      |                  |                 |                    |
| 50 | Sorokin 1983      | Pomella       | .             | copepods       | mar zoop | 7.73213148 | 11.11111111 | 4.02298851 | 1.93306673 | 0.82336711 | 1.64021164 | 0.29693487 | 0.29184236 |  |  |  |  |  |  |  |               |                   |                      |                  |                 |                    |
| 50 | Sorokin 1983      | Acartia       | .             | copepods       | mar zoop | 7.70172639 | 9.72222222  | 5.36398467 | 1.60174235 | 1.14652077 | 1.64021164 | 0.86834734 | 0.33903071 |  |  |  |  |  |  |  |               |                   |                      | used average     | marine calanoid |                    |
| 51 | Teal 1962         | Prokelisia    | .             | hopper         | Insect   | 9.5528     |             |            | 0.78997    | 0.8049     |            |            | 0.01242    |  |  |  |  |  |  |  |               |                   |                      |                  |                 |                    |
| 51 | Teal 1962         | Orchelimum    | .             | katydid??      | Insect   | 10.7095    |             |            | 0.0601     | 0.6727     |            |            |            |  |  |  |  |  |  |  |               |                   |                      |                  |                 |                    |
| 51 | Teal 1962         | Uca           | .             | crabs          | invert   | 6.93333333 | 7.9         | 5.5        | 0.904802   | 1.40166667 | 7.9        | 5.5        | 0.904802   |  |  |  |  |  |  |  |               |                   |                      |                  |                 |                    |
| 51 | Teal 1962         | Sesarma       | .             | crabs          | invert   | 6.93333333 | 7.9         | 5.5        | 0.904802   | 1.40166667 | 7.9        | 5.5        | 0.904802   |  |  |  |  |  |  |  |               |                   |                      |                  |                 |                    |
| 51 | Teal 1962         | Mediolus      | .             | mussel         | invert   | 8.53483887 | 9.52380952  | 7.52688172 | 0.78820196 | 0.83951371 | 1.29041667 | 0.54987551 | 0.2593176  |  |  |  |  |  |  |  |               |                   |                      |                  |                 |                    |
| 51 | Teal 1962         | Littorina     | .             | molluscs       | invert   | 9.1        |             |            |            | 0.566751   |            |            |            |  |  |  |  |  |  |  |               |                   |                      |                  |                 |                    |
| 51 | Teal 1962         | Oligochaete   | .             | polychaete     | invert   | 10.57      |             |            |            | 0.281827   |            |            |            |  |  |  |  |  |  |  |               |                   |                      |                  |                 |                    |
| 51 | Teal 1962         | Streptosio    | .             | polychaete     | invert   | 10.57      |             |            |            | 0.281827   |            |            |            |  |  |  |  |  |  |  |               |                   |                      |                  |                 |                    |
| 51 | Teal 1962         | Capitella     | .             | polychaete     | invert   | 10.57      |             |            |            | 0.281827   |            |            |            |  |  |  |  |  |  |  |               |                   |                      |                  |                 |                    |
| 51 | Teal 1962         | Manayunkia    | .             | polychaete     | invert   | 10.57      |             |            |            | 0.281827   |            |            |            |  |  |  |  |  |  |  |               |                   |                      |                  |                 |                    |
| 52 | Van Hook 1971     | Melanoplus    | sanguinipes   | Acrididae      | Insect   | 10.9713    |             |            | 0.70796    | 0.65395    |            |            | 0.1384     |  |  |  |  |  |  |  |               |                   |                      |                  |                 |                    |
| 52 | Van Hook 1971     | Conocephalus  | fasciatus     | Insect         | Insect   | 10.7595    |             |            | 0.0601     | 0.6727     |            |            |            |  |  |  |  |  |  |  |               |                   |                      |                  |                 |                    |
| 52 | Van Hook 1971     |               |               | Homoptera/ H   | Insect   | 8.981      |             |            | 2.1489     | 0.8503     |            |            | 0.18719    |  |  |  |  |  |  |  |               |                   |                      |                  |                 |                    |
| 52 | Van Hook 1971     |               |               | Gryllidae (omr | Insect   | 10.816     |             |            | 1.1839     | 0.6503     |            |            | 0.1141     |  |  |  |  |  |  |  |               |                   |                      |                  |                 |                    |
| 53 | Weisse et al 1990 | Mesocyclops   | leuckarti     | zooplankton    | invert   | 10.15      | 10.4        | 9.9        | 0.35353339 | 0.905      | 1.16       | 0.65       | 0.36062446 |  |  |  |  |  |  |  |               |                   |                      |                  |                 |                    |
| 53 | Weisse et al 1990 | Cyclops       | vicinus       | zooplankton    | invert   | 10.85      | 10.85       | 10.85      | 0          | 1.35       | 1.35       | 1.35       | 0          |  |  |  |  |  |  |  |               |                   |                      |                  |                 |                    |
| 53 | Weisse et al 1990 | Daphnia       | hyalina       | zooplankton    | invert   | 8.21285714 | 8.21285714  | 8.21285714 | 0          | 1.1375     | 1.1375     | 1.1375     | 0          |  |  |  |  |  |  |  |               |                   |                      |                  |                 |                    |
| 53 | Weisse et al 1990 | Daphnia       | galeata       | zooplankton    | invert   | 8.21285714 | 8.21285714  | 8.21285714 | 0          | 1.1375     | 1.1375     | 1.1375     | 0          |  |  |  |  |  |  |  |               |                   |                      |                  |                 |                    |
|    |                   |               |               |                |          |            |             |            |            |            |            |            |            |  |  |  |  |  |  |  |               |                   | Elser et al. 20i     | Elser et al. 20i | used            | Diacyclops thomasi |

## LITERATURE USED FOR THE COMPILATION OF THE DATA SETS

Admiraal, W., Bouwman, L. A., Hoekstra, L. & Romeyn, K. Qualitative and Quantitative Interactions between Microphytobenthos and Herbivorous Meiofauna on a Brackish Intertidal Mudflat. *Int. Revue ges. Hydrobiol.* 68, 175-191 (1983)

Aerts R (1989) Aboveground biomass and nutrient dynamics of *Calluna vulgaris* and *Molinia caerulea* in a dry heathland. *Oikos* 56: 31-38

Aerts, R., B.S. Waller and N. Malmer. 1992. Growth limiting nutrients in Sphagnum dominated bogs subject to low and high atmospheric nitrogen supply. *J. Ecology* 80: 131-140

Aizaki M, Takamura N (1991) Regeneration of nutrient and detritus formation from aerobic decomposition of natural phytoplankton. *Jpn J Limnol* 52:83-94

Albright LJ, Chocair J, Masuda K, Valdes M (1980) In situ degradation of the kelps *Macrocystis integrifolia* and *Nereocystis luetkeana* in British Columbia coastal waters. *Nat Can* 107: 3-10

Andersen FO (1978) Effects of nutrient level on the decomposition of *Phragmites communis* Trin Arch *Hydrobiol* 84: 42-54.

Andersen, F. and E. Kristensen. 1988. The influence of macrofauna on estuarine benthic community metabolism: a microcosm study. *Mar. Biol.* 99:591-603.

Anderson, M. G. Use of sago pondweed by waterfowl on the Delta Marsh, Manitoba. *J. Wildl. Manage.* 40, 233-242 (1976)

Anderson, M.R., Cardinal A. and Laroche J. (1981). An alternate growth pattern for *Laminaria longicuris*. *J. Phycol.* 17: 405-411.

Arndt, H., M. Kroker, B. Nixdorf, and A.Kohler. 1993. Long-term annual and seasonal changes of meta- and protozooplankton in Lake Muggelsee (Berlin): Effects of eutrophication grazing activities, and the impact of predation. *Int. Revue ges. Hydrobiol.* 78:379-402.

Atkinson, M. J., R. W. Grigg (1984). Model of a coral reef ecosystem: II. Gross and net benthic primary production at French Frigate Shoals, Hawaii. *Coral Reefs* 3: 13-22

Auclair, A. N. D., Bouchard, A. & Pajaczkowski, J. Productivity in a *Carex*-dominated ecosystem. *Oecologia* 26, 9-31 (1976)

Aziz, S.A and D.B. Nedwell. 1986. The nitrogen cycle of an east coast, U.K. saltmarsh: I. Nitrogen assimilation during primary production: Detrital mineralization. *Est. Coast. Shelf Sci.* 22: 559-575

- Bach, S. D., M. N. Josselyn (1979). Production and biomass of *Cladophora prolifera* (Chlorophyta, Cladophorales) in Bermuda. *Bot. Mar.* 22: 163-168.
- Bach, S., G. Thayer and M. LaCroix 1986. Export of detritus from eelgrass (*Zostera marina*) beds near Beaufort, North Carolina, USA. *Mar. Ecol. Prog. Ser.* 28: 265-278.
- Baird, D. and R. E. Ulanowicz. 1989. The Seasonal Dynamics of the Chesapeake Bay Ecosystem. *Ecol. Monogr.* 59: 329-364.
- Baird, D. and R. E. Ulanowicz. 1993. Comparative study on the trophic structure, cycling and ecosystem properties of four tidal estuaries. *Mar. Ecol. Prog. Ser.* 99: 221-237.
- Bak, R. 1994. Sea urchin bioerosion on coral reefs: place in the carbonate budget and relevant variables. *Coral Reefs* 13: 99-103.
- Baldwin, J. R. and J. R. Lovvorn. 1994. Expansion of seagrass habitat by the exotic *Zostera japonica* and its use by dabbling ducks and brant in Boundary Bay, British Columbia. *Mar. Ecol. Prog. Ser.* 103: 119-127.
- Barko, J. W., Murphy, P. G. & Wetzel, R. G. An investigation of primary production and ecosystem metabolism in a Lake Michigan dune pond. *Arch. Hydrobiol.* **81**, 155-187 (1977).
- Bastardo H (1979). Laboratory studies on decomposition of littoral plants. *Arch. Hydrobiol.* 26: 267-299.
- Bayley SE, Zoltek J Jr, Hermann AJ, Dolan TJ, Tortora L (1985). Experimental manipulation of nutrients and water in a freshwater marsh: effects on biomass, decomposition, and nutrient accumulation. *Limnol. Oceanogr* 30: 500-512.
- Behrendt, H. 1990. The chemical composition of phytoplankton and zooplankton in an eutrophic shallow lake. *Arch. Hydrobiol.* 118:129-145.
- Benner R, Fogel ML, Sprague EK (1991) Diagenesis of belowground biomass of *Spartina alterniflora* in salt-marsh sediments. *Limnol. Oceanogr.* 36: 1358-1374.
- Bernard, J.M and B.A. Solsky. 1977. Nutrient cycling in a *Carex lacustris* wetland. *Can. J. Bot.* 55: 630-638
- Best EPH, Dassen JHA, Boon JJ, Wiegers G (1990). Studies on decomposition of *Ceratophyllum demersum* litter under laboratory and field conditions: losses of dry mass and nutrients, qualitative changes in organic compounds and consequences for ambient water and sediments. *Hydrobiologia* 194: 91-114.
- Biddanda BA (1988) Microbial aggregation and degradation of phytoplankton-derived detritus in seawater. II. Microbial metabolism. *Mar Ecol Prog Ser* 42: 89-95

Bienfag, P. and D. Zieman. 1992. The role of Coastal High Latitude Ecosystems in Global Export Production , p. 285-298. *In* P. Falkowski and A. Woodhead [eds], Primary Productivity and Biogeochemical Cycles in the Sea. Plenum Press.

Billings, W. D. Carbon balance of Alaskan tundra and taiga ecosystem: past, present and future. *Quat. Sci. Rev.* **6**, 165-177 (1987).

Birch PB, Gabrielson JO, Hamel KS (1983) Decomposition of *Cladophora*. I Field studies in the Peel-Harvey estuarine system, Western Australia. *Bot Mar* 26: 165-171

Bishop, J.K.B., J.M. Edmund, D.R. Ketter, M.P. Baeen and W.B. Silver. 1977. The chemistry, biology and vertical flux of particulate matter from the upper 400m of the equatorial Atlantic Ocean. *Deep-Sea Res.* 24: 511-548

Bliss, L. C. in *Structure and Function of Tundra Ecosystems* (eds Rosswall, T. & Heal, O.) 17-60 (Tundra Biome Steering Committee, Stockholm, 1975).

Blum, L. 1993. *Spartina alterniflora* root dynamics in a Virginia marsh. *Mar. Ecol. Prog. Ser.* 102:169-178.

Boring, L.R., C.D. Monk, and W.T. Swank (1981) Early regeneration of a clear-cut southern Appalachian forest. *Ecology* 62(5):1244-1253

Boyd, C.E. 1970. Production, mineral accumulation and pigment concentrations in *Typha latifolia* and *Scirpus americanus* *Ecology* 51: 285-290

Boyd, C.E. 1971. The dynamics of dry matter and chemical substances in a *Juncus effusus* population. *Am. Midl. Nat.* 86: 28-45

Boyer, M.L.H. and B.D. Wheeler. 1989. Vegetation patterns in spring-fed calcareous fens: calcite precipitation and constraints on fertility. *J. Ecology* 77: 597-609

Bray, J. R. Primary consumption in three forest canopies. *Ecology*, **45**, 165-167 (1964).

Breteler RJ, Teal JM (1981) Trace elements enrichments in decomposing litter of *Spartina alterniflora*. *Aquat. Bot.* 11: 111-120

Briggs SV, Maher MT, Tongway DJ (1985) Dry matter and nutrient loss from decomposing *Vallisneria spiralis* L. *Aquat. Bot.* 22: 387-392.

Brouwer PEM. 1996. Decomposition in situ of the sublittoral Antarctic macroalgae *Desmarestia anceps* Montagne. *Polar Biol.* 16: 129-137

Brown S, Flohrschutz EW, Odum HT. 1984. Structure, productivity and phosphorus cycling of the scrub cypress ecosystem. *In*: KC Ewel and HT Odum (eds): "Cypress swamps", University Presses of Florida. Gainesville, Fla. pp. 304-317

- Burns, K., M. Ehrhardt, B. Hows and G. Taylor. 1993. Subtidal Benthic Community Respiration and production near the heavily oiled Gulf Coast of Saudi Arabia. *Mar. Pollut. Bul.* 27: 199-205.
- Bustamante, R. H., Branch, G. M., Eekhout, S., Robertson, B., Zoutendyk, P., Schleyer, M., Dye, A., Hanekom, N., Keats, D., Jurd, M. and McQuaid, C. 1995. Gradients of intertidal primary productivity around the coast of South Africa and their relationships with consumer biomass. *Oecologia* 102: 189-201.
- Buth, G. 1987. Decomposition of roots of three plant communities in a dutch salt marsh. *Aquat. Bot.* 29:123-128.
- Bythell, J., E. Gladfelter and M. Bythell. 1993. Chronic and catastrophic natural mortality of three common Caribbean reef corals. *Coral Reefs* 12:143-152.
- Cadee, G. C., J. Hegeman (1977). Distribution of primary production of the benthic microflora and accumulation of organic matter on a tidal flat area, Balgzand, Dutch Wadden Sea. *Neth. J. Sea Res.* 11: 24-41
- Cahoon, D. and J. Stevenson. 1986. Production, predation and decomposition in a low-salinity *Hibiscus* marsh. *Ecology* 67:1341-1350.
- Cammen, L. M. 1980. The significance of microbial carbon in the nutrition of the deposit feeding polychaete *Nereis succinea*. *Mar. Biol.* 61: 9-20.
- Carpenter, R. C. Partitioning herbivory and its effects on coral reef algal communities. *Ecol. Monogr.* 56, 345-363 (1986).
- Cattaneo, A. Grazing on epiphytes. *Limnol. Oceanogr.* **28**, 124-132 (1983).
- Cebrian, J and C.M. Duarte. 1998. Patterns in leaf herbivory on seagrasses. *Aquatic Botany* 60: 67-82
- Cebrian, J., C. M. Duarte, N. Marbà, S. Enríquez, M. Gallegos and B. Olesen. 1996. Herbivory on *Posidonia oceanica* (L.) Delile: magnitude and variability in the Spanish Mediterranean. *Mar. Ecol. Progr. Ser.* 130: 147-155.
- Cebrián, J., C. M. Duarte, N. Marbà and S. Enríquez. 1997. The magnitude and fate of production of four co-occurring Western Mediterranean seagrass species. *Mar. Ecol. Progr. Ser.* 155 : 29-44
- Cebrian J., M. F. Pedersen, K. Kroeger, I. Valiela. 2000. Fate of production of the seagrass *Cymodocea nodosa* in different stages of meadow formation. *Mar. Ecol. Progr. Ser.* 204:119-130
- Chapin III, F. S., P. C. Miller, W. D. Billings and P. I Coyne. (1980). Carbon and nutrient budgets and their control in coastal tundra. In Brown, J., P. C. Miller, L. L. Tieszen and

- F. L. Bunnell (eds). An Arctic Ecosystem: The Coastal Tundra at Barrow, Alaska. Chapter 12, pp. 458-482. Dowden, Hutchinson and Ross Stroudsburg, Pennsylvania.
- Chapman ARO, Craigie JS. 1978. Seasonal growth in *Laminaria longicuris*: relations with reserve carbohydrate storage and production. *Mar. Biol.* 46: 209-213
- Chavez, F., K. Buck, K. Coale, J. Martin, G. DiTullio, N. Welschmeyer, A. Jacobsen and R. Barber. 1991. Growth rates, grazing, sinking and iron limitation of equatorial pacific phytoplankton. *Limnol. Oceanogr.* 36: 1816-1833.
- Chew, R. M. & Chew, A. E. Energy relationships of the mammals of a desert shrub (*Larrea tridentata*) community. *Ecol. Monogr.* **40**, 1-21 (1970).
- Christensen, B. (1978). Biomass and primary production of *Rhizophora apiculata* in a mangrove in Southern Thailandia. *Aquat. Bot.* 4: 43-52.
- Cloern, J., Cole, B. & Wienke, S. Big Soda Lake (Nevada). 4. Vertical fluxes of particulate matter: seasonality and variations across thermocline. *Limnol. Oceanogr.* **32**, 815-824 (1987).
- Clymo, R. S. The limits to peat bog growth. *Phil. Trans. R. Soc. B.* **303**, 605-654 (1984)
- Coppock, D. L., Detling, J. K., Ellis, J. E. & Dyer, M. I. Plant-Herbivore Interactions in a North American Mixed-Grass Prairie. *Oecologia* **56**, 1-56 (1983)
- Coveney, M. F., Cronberg, G., Enell, M., Larsoon, H. & Olofsson, L. Phytoplankton, zooplankton and bacteria-standing crop and production relationships in a eutrophic lake. *Oikos* **29**, 5-21 (1977).
- Craft CB, Broome SW and Seneca ED. 1988. Soil nitrogen, phosphorus and organic carbon in transplanted estuarine marshes. In DD Hook, WH McKee, HK Smith, J Gregory, VG Burrell Jr. Mr. DeVoe, RE Sojka, S Gilbert, R Banks, LH Stolzy, C Brooks, TD Matthews and TH Shear (eds.). pp. 351-355 *The Ecology and Management of Wetlands*. Timber Press Portland (OR).
- Cushing, D. H. Grazing in Lake Erken. *Limnol. Oceanogr.* **21**, 349-356 (1976).
- Cyr, H. and M. L. Pace. 1993. Magnitude and patterns of herbivory in aquatic and terrestrial ecosystems. *Nature* 361: 148-150.
- Damman, A.W.H. 1978. Distribution and movement of elements in ombrotrophic peat bogs. *Oikos* 30: 480-495
- Darley, W. M., Montague, C. L., Plumley, F. G., Sage, W. W. & Psalidas, A. T. Factors limiting edaphic algal biomass and productivity in a Georgia salt marsh. *J. Phycol.* 17, 122-128 (1981).



Davis SM (1991) Growth, decomposition and nutrient retention of *Cladium jamaicense* Crantz and *Thypha dominguensis* Pers. in the Florida everglades. *Aquat. Bot.* 40: 203-224.

Davis, M. and H. Lee. 1983. Recolonization of sediment-associated microalgae and effects of estuarine infauna on microalgal production. *Mar. Ecol. Prog. Ser.* 11: 227-232.

Davis, M. W., C. D. McIntire (1983). Effects of physical gradients on the production dynamics of sediments-associated algae. *Mar. Ecol. Prog. Ser.* 13: 103-114.

Day, F. P. Litter decomposition rates in the seasonally flooded great dismal swamp. *Ecology* **63**, 670-678 (1982).

Day, J., W. Smith, P. Wagner and W. Stone. 1973. Community structure and carbon budget of a salt marsh and shallow bay estuarine system in Louisiana. Center for Wetland Resources, Louisiana State University, Baton Rouge, Publ. NO. LSU-SG-72-04.

Day, T. A. and J. K. Detling. 1990. Grassland patch dynamics and herbivory grazing preference following urine deposition. *Ecology* 71: 180-188.

de la Cruz, A. A. The role of tidal marshes in the productivity of coastal waters. *Assoc. Southeast. Biol. Bull.* 20, 147-156 (1973)

DeAngelis, D. L., Gardner, R. H. & Shugart, H. H. in *Dynamic Properties of Forest Ecosystems* (ed Reichle, D. E.) 567-672 (Cambridge University Press, New York, 1981).

Drew, E. A., and R. M. Hastings. 1992. A year-round ecophysiological study of *Himantothallus grandifolius* (Desmarestiales, Phaeophyta) at Sygny Island, Antarctica. *Phycologia* 31:262-277.

Dunton, K.H. and Schell, D.M. 1986. Seasonal carbon budget and growth of *L. solidungula* in the Alaskan high arctic. *Mar. Ecol. Prog. Ser.* 31: 57-66

Durbin, E.G., Krawiec, R.W. and Smaydan, T.J. 1975. Seasonal studies on the relative importance of different size fractions of phytoplankton in Narragansett Bay, USA. *Marine Biology* 32:271-287.

Edroma, E. L. 1984. Effects of burning and grazing on the productivity and number of plants in Queen Elizabeth National Park, Uganda. *African Journal of Ecology* 22: 165-174.

Egan, B and Yarish, C. 1990. Productivity and life history of *L. longicuris* at its southern limit in the western atlantic ocean. *Mar. Ecol. Prog. Ser.* 67: 263-273

Emmerson, W. and L. McGwynne. 1992. Feeding and assimilation of mangrove leaves by the crab *Sesarma meinerti* de Man in relation to leaf-litter production in Myazana, a warm-temperate southern mangrove swamp. *J. Exp. Mar. Biol. Ecol.*, 157: 41-53.

- Erfteimeier P., R. Osinga and M. Astrid. 1993. Primary production of seagrass beds in South Sulawesi (Indonesia): a comparison of habitats, methods and species. *Aquat. Bot.* 46: 67-90.
- Fahey TJ, Stevens PA, Hornung M, Rowland P (1991) Decomposition and nutrient release from logging residue following conventional harvest of Sitka spruce in North Wales. *Forestry* 64: 289-301
- Findlay, S, Howe K, Austin HK (1990) Comparison of detritus dynamics in two tidal freshwater wetlands. *Ecology* 71: 288-295.
- Flint, R. W. & Goldman, C. R. The effects of a benthic grazer on the primary productivity of the littoral zone of Lake Tahoe. *Limnol. Oceanogr.* **20**, 935-945 (1975).
- Flores Verdugo, F. J., J. W. Day, R. Briseno-Duenas (1987). Structure, litter fall, decomposition and detritus dynamics of mangroves in a Mexican coastal lagoon with an ephemeral inlet. *Mar. Ecol. Prog. Ser.* 35: 83-90.
- Frangi, J. L. & Lugo, A. E. Ecosystem dynamics of a subtropical floodplain forest. *Ecol. Monogr.* **55**, 351-369 (1985).
- Frank, D.A. and S.J. McNaughton (1992) The ecology of plants, large mammalian herbivores, and drought in Yellowstone National Park. *Ecology* 73(6):2043-2058
- Frankignoulle, M., J. Bouquegneau, E. Ernst, R. Biondo, M. Rigo and D. Bay. 1984. Contribution de l'activité de l'Herbier de Posidonies au Metabolisme global de la Baie de Calvi. *Premiers Resultats*, p. 277-282. *In* C. Boudouresque, A. Jeudy de Grissac and J. Olivier [eds.], *International Workshop Posidonia oceanica Beds (I) GIS Posidonie* publ.
- Frost, B. W. The role of grazing in nutrient-rich areas of the open sea. *Limnol. Oceanogr.* 36, 1616-1630 (1991)
- Gabrielson JO, Birch PB, Hamel KS. (1983). Decomposition of Cladophora. II. In vitro studies of nitrogen and phosphorus regeneration. *Bot Mar* 26: 173-179
- Gallagher, J.L., R.J. Reinhold, R.A. Linthurst and W.J. Pfeiffer. 1980. Aerial production, mortality and mineral accumulation-export dynamics in *S. alterniflora* and *J. roemerianus* plant stands in a georgia saltmarsh. *Ecology* 61: 303-312
- Gandar, M. V. The dynamics and trophic ecology of grasshoppers (Acridoidea) in a South African Savanna. *Oecologia* **54**, 370-378 (1982).
- Garber JH. 1984. Laboratory study of nitrogen and phosphorus remineralization during the decomposition of coastal plankton and seston. *Estuarine Coastal Shelf Sci* 18: 685-702
- Garnier, J. & Mourelatos, S. Contribution of grazing in phytoplankton overall losses in a shallow French lake. *Fresh. Biol.* **25**, 515-523 (1991).

- Gathuso, J., M. Pichon, B. Delesalle and M. Frankignoulle. 1993. Community metabolism and air-sea CO<sub>2</sub> fluxes in a coral reef ecosystem (Moore, French Polynesia). *Mar. Ecol. Prog. Ser.* 96: 259-267.
- Geertz-Hansen, O., Sand-Jensen, K., Hansen, D.F. and Christiansen, A. 1993. Growth and grazing control of abundance of marine macroalgae, *Ulva lactuca* L. in an eutrophic Danish estuary. *Aquat. Bot.* 46: 101-109.
- Gerard, V. 1976. Some aspects of material dynamics and energy flow in a kelp forest in Monterey Bay, California. Ph. D. Thesis, University of California, Santa Cruz.
- Gliwicz, Z. M. & Hillbricht-Ilkowska. Efficiency of the utilization of nannoplankton primary production by communities of filter feeding animals measured in situ. *Verh. Internat. Verein. Limnol.* **18**, 197-203 (1972).
- Godshalk GL, Wetzel RG (1978a) Decomposition of aquatic angiosperms. II Particulate components. *Aquat. Bot.* 5: 301-327.
- Godshalk GL, Wetzel RG (1978b). Decomposition of aquatic angiosperms. III *Zostera marina* L. and a conceptual model of decomposition. *Aquat. Bot.* 5: 329-354.
- Golley, F. B. 1960. Energy dynamics of a food chain of an old-field community. *Ecol. Monogr.* 30: 187-206.
- Golley, F., H. Odum and R. Wilson. 1962. The structure and metabolism of a Puerto Rican Red Mangrove Forest in May. *Ecology* 43: 8-19.
- Golterman HL (1972) The role of phytoplankton in detritus formation. *Mem Ist Ital Idrobiol* 29: 89-103
- Gosz, J. R., Holmes, R. T., Likens, G. E. & Bormann, F. H. The flow of Energy in a Forest Ecosystem. *Sci. Am.* **238**, 93-102 (1978).
- Gould, D. and E. Gallagher. 1990. Field measurement of specific growth rate, biomass and primary production of benthic diatoms of Savin Hill Cove, Boston. *Limnol. Oceanogr.* 35:1757-1770.
- Graneli, W. (1989). Influence of standing litter on shoot production in reed, *Phragmites australis*. *Aquat. Bot.* 35: 99-109.
- Gray, J. T. Community structure and productivity in *Ceanothus* chaparral and coastal sage scrub of southern California. *Ecol. Monogr.* **52**, 415-435 (1982).
- Greenway, M. The grazing of *Thalassia testudinum* in Kingston Harbour, Jamaica. *Aquat. Bot.* 2, 117-126 (1976).

Grier, C. C. & Logan, R. S. Old-growth *Pseudotsuga menziesii* communities of a western Oregon watershed: biomass distribution and production budgets. *Ecol. Monogr.* **47**, 373-400 (1977).

Grodzinski, W., A. Gorecki, K. Janas and P. Migula. 1966. Effect of rodents on the primary productivity of alpine meadows in Bierzezady mountains. *Acta Theriol.* **11**: 419-431.

Gulati, R. D. A study on the role of herbivorous zooplankton community as primary consumers of phytoplankton in Dutch lakes. *Verh. Internat. Verein. Limnol.* **19**, 1202-1210 (1975).

Haines EB, Hanson RB (1979) Experimental degradation of detritus made from the salt marsh plants *Spartina alterniflora* Loisel, *Salicornia virginica* L. and *Juncus roemerianus* Scheele. *J Exp mar Biol Ecol* **40**: 27-40

Hanisak, M.D. 1979. Nitrogen limitation of *C. Fragile* ssp. *tomentosoides* as determined by tissue analysis. *Marine Biology* **50**: 333-337

Hansen, J. A., D. Klumpp, D. Alongi, P. Dayton and M. Riddle. 1992. Detrital pathways in a coral reef lagoon. II. Detritus deposition, benthic microbial biomass and production. *Mar. Biol.* **113**: 363-372.

Harris, W. F., Sollins, P., Edwards, N. T., Dinger, B. E. & Shugart, H. H. in *Productivity of the world systems. Proceedings of a Symposium* (eds Reichle, D., Franklin, J. & Goodall, D.) 116-122 (National Academy of Sciences, Washington, D.C, 1975).

Harrison PG (1982) Control of microbial growth and of amphipod grazing by water soluble compounds from leaves of *Zostera marina*. *Mar Biol* **67**: 225-230

Harrison PG (1989) Detrital processing in seagrass systems: a review of factors affecting decay rates, remineralization and detritivory. *Aquat Bot* **23**: 263-288

Harrison, W. G., E. Head, E. Horne, B. Irwin, W. Li, A. Longhurst, M. Paranjape and T. Platt. 1993 The Western North Atlantic Bloom Experiment. *Deep-Sea Res.* **40**: 279-305.

Hatcher, B.G., S. V. Smith and C. Crossland. 1992. The role of Coral Reefs in Global Ocean Production, p. 513-514. *In* P. Falkowski and A. Woodhead [eds.], *Primary Productivity and Biogeochemical Cycles in the Sea*. Plenum Press.

Haukioja, E. and Koponen S. 1975. Birch herbivores and herbivory at Kevo. In *Fennoscandian Tundra Ecosystems. Part 2. Animals and System Analyses* (ed. Wielgolaski, F. E.) 181-188 (Springer, Heidelberg).

Hauxwell J, McClelland J, Behr PJ, Valiela I. 1998. Relative importance of grazing and nutrient controls of macroalgal biomass in three temperate shallow estuaries. *Estuaries* **21**: 347-360

- Hauxwell, J., J. Cebrian and I. Valiela. 2002. Annual growth dynamics of eelgrass (*Zostera marina* L.) in estuaries of Waquoit Bay, MA, USA: Relationship to land-derived nitrogen loads and effect on light supply for eelgrass. *Mar. Ecol. Prog. Ser.* (in press).
- Heal, O. W. in *Tundra Biome. Proceedings IV International Meeting on the Biological Productivity of Tundra* (eds Wielgolaski, F. & Rosswall, T. ) 295-305 (Tundra Biome Steering Committee, Stockholm, 1972).
- Hemmings MA, Buth GJC (1991) Decomposition in salt marsh ecosystems of the SW Netherlands: the effects of biotic and abiotic factors. *Vegetatio* 92: 73-83
- Hemmings MA, Nieuwenhuize J (1991) Transport, deposition and "in situ" decay of seagrasses in a tropical mudflat area (Banc d'Arguin, Mauritania). *Neth J Sea Res* 27: 183-190
- Hill BH (1979) Uptake and release of nutrients by aquatic macrophytes. *Aquat. Bot.* 7: 87-93.
- Hodges, C., T. Thompson, J. Riley and E. Glenn. 1993. Reversing the flow: water and nutrients from the sea to the land. *Ambio* 22: 483-490.
- Holligan, P.M., P. J. leB. Williams, D. Purdie and R. Harris. 1984. Photosynthesis, respiration and nitrogen supply of plankton populations in stratified, frontal and tidally mixed shelf waters. *Mar. Ecol. Prog. Ser.* 17:201-213.
- Holligan P., E. Fernández, J. Aiken, W. Balch, P. Boyd, P. Burkill, M. Finch, S. Groom, G. Malin, K. Muller, D. Purdie, C. Robinson, C. Trees, S. Turner and P. van der Wal. 1993. A Biogeochemical Study of the Coccolithophore, *Emiliana huxleyi*, in the north Atlantic. *Global Biogeochem. Cycles* 7: 879-900.
- Hopkinson, O., J. Gosselink and R. Panardo. 1978. Aboveground production of seven marsh plant species in coastal Louisiana. *Ecology* 59: 760-769.
- Howes, B., J. Dacey and J. Teal. 1985. Annual C mineralization and belowground production of *Spartina alterniflora* in a new England salt marsh. *Ecology* 66: 595-605.
- Hunter, R. D. Effects of grazing on the quantity and quality of freshwater aufwuchs. *Hydrobiologia* 69, 251-259 (1980).
- Iriarte, A., G. Daneri, V. Garcia, D. Purdie and D. Crawford. 1991 Plankton community respiration and its relationship to Cha concentration in marine coastal waters. *Oceanologia Acta* 14:379-387.
- Jacobs, R., den Hartog, C., Braster, C. & Carrière, F. Grazing of the seagrass *Zostera noltii* by birds at Terschelling (Dutch Wadden Sea). *Aquat. Bot.* 10, 241-259 (1981).
- Jacoby, J. M. Alterations in periphyton characteristics due to grazing in a Cascade foothill stream. *Fresh. Biol.* 18, 495-508 (1987).

- Jensen, L. M. & Schwaerter, S. Major pathways involved in the utilization of primary production in a temperate eutrophic lake. *Verh. Internat. Verein. Limnol.* **23**, 445-450 (1988).
- Jensen, L. M., K. Sand-Jensen, S. Marcher and M. Hansen. 1990. Plankton community respiration along a nutrient gradient in a shallow Danish Estuary. *Mar. Ecol. Prog. Ser.* **61**:75-85
- Jespersen, A. M., Christoffersen, K. & Riemann, B. Annual carbon fluxes between phyto-, zoo-, and bacterio-plankton in eutrophic, Lake Frederiksborg Slotssø, Denmark. *Verh. Internat. Verein. Limnol.* **23**, 440-444 (1988).
- Johnson, F.L. and P.G. Rissor. 1974. Biomass, annual net primary production and dynamics of six mineral elements in a post oak-blackjack oak forest. *Ecology.* **55**: 1246-1258
- Johnson, K. M., C. M. Burney and J. Sieburth. 1981. Enigmatic marine ecosystem metabolism measured by direct diel  $\Sigma\text{CO}_2$  and  $\text{O}_2$  flux in conjunction with DOC release and uptake. *Mar. Biol.* **65**:49-60.
- Johnstone, I. M. (1981) Consumption of leaves by herbivores in mixed mangrove stands. *Biotropica* **13**: 252-259.
- Joiris, C., G. Billen, C. Lancelot, M. Daro, J. Mommaerts, A. Bertels, M. Bossicart and J. Nijs. 1982. A budget of Carbon Cycling in the Belgian Coastal Zone: Relative roles of zooplankton, bacterioplankton and benthos in the utilization of Primary Production. *Neth. J. Sea Res.* **16**:260-275.
- Josselyn M. N., A. C. Mathieson (1980). Seasonal influx and decomposition of autochthonous macrophyte litter in a north temperate estuary. *Hydrobiologia* **71**: 197-208.
- Josselyn, M., M. Fonseca, T. Niesen and R. Larson. 1986. Biomass, production and decomposition of a deep water seagrass, *Halophila decipiens* Ostenf. *Aquat. Bot.* **25**: 47-61.
- Jupp, B. P. & Spence, D. H. N. Limitations of macrophytes in a eutrophic lake, Loch Leven. II Wave action, sediments and waterfowl grazing. *J. Ecol.* **65**, 431-446 (1977).
- Kamiyama, T. 1994. The impact of grazing by microzooplankton in northern Hiroshima Bay, the Seto Island Sea, Japan. *Mar. Bio.* **119**:77-88.
- Karagatzides, J. D. & Hutchinson, I. Intra-specific comparisons of biomass dynamics in *Scirpus americanus* and *Scirpus maritimus* on the River Delta. *J. Ecol.* **79**, 459-476 (1991).

- Kemp, W. M. and W. R. Boynton. 1980. Influence of biological and physical processes on dissolved oxygen dynamics in an Estuarine System: implication for measurement of community metabolism. *Estuar. Coast. Mar. Sci.* 2:407-431.
- Kenney, B., W. Litaker, C. Duke and J. Ramus. 1988. Community oxygen metabolism in a shallow tidal estuary. *Estuar. Coast. Shelf Sci.* 27:33-34.
- Kenworthy, J. and G. Thayer. 1984. Production and decomposition of the roots and rhizomes of seagrasses, *Zostera marina* and *Thalassia testudinum*, in temperate and subtropical marine ecosystems. *Bull. Mar. Sci.* 35: 364-379.
- Khailov, K. M. & Burlakova, Z. P. Release of dissolved organic matter by marine seaweeds and distribution of their total organic production to inshore communities. *Limnol. Oceanogr.* 14, 521-527 (1969).
- Kiene, W. and P. Hutchings. 1994. Bioerosion experiments at Lizard Island, Great Barrier Reef. *Coral Reefs* 13:91-98.
- King, F., A. Devol and T. Packard. 1978. Plankton metabolic activity in the eastern tropical North Pacific. *Deep-Sea Res.* 25: 689-704.
- Kira, T. in *Tropical trees as living systems* (eds Tomlinson, P. B. & Zimmerman, M. H.) 561-590 (Cambridge University Press, New York, 1978)
- Kirkman, D. & Reid, D. A study of the role of the seagrass *Posidonia australis* in the carbon budget of an estuary. *Aquat. Bot.* 7, 173-183 (1979).
- Klopatek, J. & Stearns, F. Primary productivity of Emergent Macrophytes in a Wisconsin freshwater marsh ecosystem. *Am. Mid. Nat.* **100**, 320-332 (1978).
- Klumpp D. and N. Polunin. 1989. Partitioning among grazers of food resources within damselfish territories on a coral reef. *J. Exp. Mar. Ecol. Biol.* 125: 145-169.
- Klumpp, D., R. Howard, D. Pollard. 1989. Trophodynamics and nutritional ecology of seagrass communities, p. 349-475. *In* A. Larkum, A. McComb and S. Sepherd S. [eds], *Biology of Seagrasses: a Treatise on the Biology of Seagrasses with Special Reference to the Australian Region*. Elsevier.
- Klumpp, D. W., Salita-Espinosa, J. S. & Fortes, M. D. The role of epiphytes and macroinvertebrate grazers in the trophic flux of a tropical seagrass community. *Aquat. Bot.* 43, 327-349 (1992)
- Klumpp, D. W., Salita-Espinosa, J. S. & Fortes, M. D. Feeding ecology and trophic role of sea urchins in a tropical seagrass community. *Aquat. Bot.* 45, 205-229 (1993).
- Knauer, G.A., Martin, J.H. and Bruleud, K.W. 1979. Fluxes of particulate carbon, nitrogen and phosphorus in the upper water column of the northeast Pacific. *Deep-sea Research.* 26: 97-108

Koop, K., R. Newell and M. Lucas. 1982. Biodegradation and carbon flow based on kelp (*Ecklonia maxima*) debris in a Sandy Beach Microcosm. *Mar. Ecol. Prog. Ser.* 7:315-326.

Kristensen, E. 1993. Seasonal variations in Benthic Community Metabolism and nutrient dynamics in a Shallow, Organic-poor danish lagoon. *Estuar. Coast. Shelf Sci.* 36:565-586.

Kristensen, E., F. Andersen and T. Blackburn. 1992. Effects of benthic macrofauna and temperature on degradation of macroalgal detritus: the fate of organic carbon. *Limnol. Oceanogr.* 37: 1404-1419.

Kruse, B. 1993. Measurement of plankton O<sub>2</sub> respiration in gas-tight plastic jars. *Mar. Ecol. Prog. Ser.* 94:155-163.

Kuparinen, J. 1986. Production and respiration for overall plankton and ultraplankton communities at the entrance to the Gulf of Finland in the Baltic Sea. *Mar. Biol.* 63:591-607.

Lampert, W. Climatic conditions and planktonic interactions as factors controlling the regular succession of spring algal bloom and extremely clear water in Lake Constance. *Verh. Internat. Verein. Limnol.* **20**, 969-974 (1978).

Lapointe, B.E., Niell, F. and Fuentes, J.M. 1981. Community structure, succession and production of seaweeds associated with mussel-beds in the Ria de Arosa, NW Spain. *Mar. Ecol. Prog. Ser.* 5: 243-253

Lawes, E., Bienfang, P., Ziemann, D. & Conquest, L. Phytoplankton population dynamics and the fate of production during the spring bloom in Auke Bay, Alaska. *Limnol. Oceanogr.* 33, 57-65 (1988).

LeBorgne, R., Blanchot, J. and L. Charpy. 1989. Zooplankton of Tikehau atoll (Thamoth archipelago) and its relationship to particulate matter. *Mar. Biol.* 102: 341-353.

LeBorgne, R., M. Rodier, A. LeBouteiller, and M. Kulbicki. 1997. Plankton biomass and production in an open atoll lagoon: Uvea, New Caledonia. *J. Exp. Mar. Biol. Ecol.* 212:187-210.

Lee, S. 1989. The importance of sesarminae crabs *Chiromanthes* sp. and inundation frequency on mangrove (*Kandelia Kandel* (L.) Durce) leaf litter turnover in a Hong Kong Tidal shrimp pond. *J. Exp. Mar. Biol. Ecol.* 1989. 131: 23-43.

Lee, S. 1990. Net aerial primary productivity, litter production and decomposition of the reed *Phragmites communis* in a nature reserve in Hong-Kong: management implications. *Mar. Ecol. Prog. Ser.* 66:161-173.

Leigh, E. G. & Windsor, D. M. in *Ecology of a tropical forest: seasonal rhythms and long term changes* 111-123 (eds Leigh, E. G., Raud, A. & Windsor, D. M. (Smithsonian Institution Press, Washington, 1983).



- Lenz, J., A. Morales and J. Gunkel. 1993 Meso-zooplankton standing stock during the North Atlantic spring bloom study in 1989 and its potential grazing pressure on phytoplankton: a comparison between low, medium and high latitudes. *Deep-Sea Res. (II)* 40: 559-572.
- Li M. S., S. Y. Lee (1998). Carbon dynamics of Deep Bay, eastern Pearl River Estuary, China. I: A mass balance budget and implications for shorebird conservation. *Mar. Ecol. Prog. Ser.* 172: 73-87.
- Lignell, R., Heiskanen, A. S., Kuosa, H., Gundersen, K., Kuuppo-Leinikki, P., Pajuniemi, R. & Uitto, A. Fate of phytoplankton spring bloom: sedimentation and carbon flow in the planktonic food web in the northern Baltic. *Mar. Ecol. Prog. Ser.* 94, 239-252 (1993).
- Lindeboom, H. and B. De Bree. 1982. Daily production and consumption in a eelgrass (*Zostera marina*) community in Saline-Lake Grevelingen: discrepancies between the O<sub>2</sub> and <sup>14</sup>C methods. *Neth. J. Sea Res.* 16:362-379.
- Lindeboom, H. and A. Sandee. 1989. Production and consumption of tropical seagrass fields in eastern Indonesia measured with bell jars and microelectrodes. *Neth. J. Sea Res.* 23:181-190.
- Lindeboom H., W. Raaphorst, H. Ridderinkhof and H. W. van der Veer. 1989. Ecosystem model of the Western Wedden Sea: a bridge between science and management. *Helgolander Meeresunters* 43: 549-564.
- Lock, J. M. 1972. The effects of hippopotamus grazing on grasslands. *J. Ecol.* 60: 445-467.
- Lowman, M. D. Litterfall and leaf decay in three australian rainforest formations. *J. Ecol.* 76, 451-465 (1988).
- Mann, K. H. 1972. Ecological energetics of the sea-weed zone in a marine bay on the Atlantic coast of Canada. II. Productivity of seaweeds. *Mar. Biol.* 14: 199-209.
- Mann, K.H. 1985. Ecology of Coastal Waters. Studies in Ecology Volume 8. 2nd ed. Blacwell.
- Mann, K.H. 1988. Production and use and detritus in various freshwater, estuarine and coastal marine ecosystems. *Limnol. Oceanogr.* 33: 910-931.
- Mason, C. F. & Bryant, R. J. Periphyton production and grazing by chironomids in Alderfen Broad, Norfolk. *Freshwat. Biol.* 5, 271-277 (1975).
- McClaugherty CA, Pastor J, Aber JD (1985) Forest litter decomposition in relation to soil nitrogen dynamics and litter quality. *Ecology* 66: 266-275

- McInnes P. F., R. J. Naiman, J. Pastor and Y. Cohen. 1992. Effects of moose browsing on vegetation and litter of the boreal forest, Isle Royale, Michigan, USA. *Ecology* 73: 2059-2075.
- McLachlan, A. & Bate, G. Carbon budget for a high energy surf zone. *Vie milieu* 34, 67-77 (1984).
- McLusky, D.S. *The estuarine ecosystem* (Wiley, New York, 1981).
- McNaughton, S. J. Ecology of a grazing ecosystem: The Serengeti. *Ecol. Monogr.* **55**, 259-294 (1985).
- McNaughton, S. J., M. Oesterheld, D. A. Frank and K. J. Williams. 1989. Ecosystem-level patterns of primary productivity and herbivory in terrestrial habitats. *Nature* 341: 142-144.
- McQuaid, C. D and G. M. Branch. 1985. Trophic structure of rocky intertidal communities: response to wave action and implications for energy flow. *Mar. Ecol. Prog. Ser.* 22: 153-161.
- Mee, L. D. 1977. *The Chemistry and Hydrography of Some Tropical Coastal Lagoons-Pacific Coast of Mexico*. Ph. D. Tesis. University of Liverpool. Dept. of Oceanography, England.
- Megonigal, J. P. & Day Jr., F. P. Organic matter dynamics in four seasonally flooded forest communities of the dismal swamp. *Amer. J. Bot.* **75**, 1334-1343 (1988).
- Menhinick, E. F. Structure, Stability and Energy flow in plants and arthropods in a *Sericea lespedeza* stand. *Ecol. Monogr.* **37**, 256-272 (1967)..
- Menzel, D. and J. Ryther. 1960 The annual cycle of primary production in the Sargasso Sea off Bermuda. *Deep Sea Res.* 6:351-357.
- Merino, M., A. González, E. Reyes, M. Gallegos and S. Czitrom. 1992. Eutrophication in the lagoons of Cancún, México. *Science of the Total Environment, Supplement* (1992): 861-870.
- Miller, P. C., Miller, P. M., Blake-Jacobson, M., Chapin, F. S., III, Everett, K. R., Hilbert, D. H., Kummerow, J., Linkins, A. E., Marion, G. M., Oechel, W. C., Roberts, S. W. & Stuart, L. Plant-soil processes in *Eriophorum vaginatum* tussock tundra in Alaska: a systems modeling approach. *Ecol. Monogr.* **54**, 361-405 (1984).
- Mitchell DT, Coley PGF, Webb S, Allsopp N (1986) Litterfall and decomposition processes in the coastal fynbos vegetation, South-Western Cape, South Africa. *J. Ecol.* 74: 977-993.
- Montagna, P. A. In situ measurement of meiobenthic grazing rates on sediment bacteria and edaphic diatoms. *Mar. Ecol. Progr. Ser.* 18, 119-130 (1984).

- Moore, T. R. Growth and net production of Sphagnum at five fen sites, subarctic eastern Canada. *Can. J. Bot.* **67**, 1203-1207 (1989)
- Müller, P. J. & Suess, E. Productivity, sedimentation rate, and sedimentary organic matter in oceans- I. Organic carbon preservation. *Deep Sea Research* 26, 1347-1362 (1979).
- Murray, L. and R.L. Wetzel. 1987. Oxygen production and consumption associated with the major autotrophic components in two temperate seagrass communities. *Mar. Ecol. Progr. Ser.* 38: 231-239.
- Naiman, R. J. Primary production, standing stock and export of organic matter in a Mohave Desert thermal stream. *Limnol. Oceanogr.* **21**, 60-73 (1976).
- Nakamori, T., A. Suzuki, Y. Iryu, *Cont. Shelf Res.* 12, 951 (1992).
- Nakanishi, M., Y. Tezuka, T. Narita, O. Mitamura, K. Kawabata and S. Nakano. 1992. Phytoplankton primary production and its fate in a pelagic area of Lake Biwa. *Arch. Hydrobiol. Beih. Ergebn. Limnol.* 35: 47-67.
- Nedwell, D. B., Walker, T. R., Ellis-Evans, J. C. & Clarke, A. Measurements of Seasonal Rates and Annual Budgets of Organic Carbon fluxes in an Antarctic Coastal Environment at Signy Island. *Appl. Environ. Microbiol.* 59, 3989-3995 (1993)
- Neely RK, Davis CB (1985) Nitrogen and phosphorus fertilization of *Spartanium eurycarpum* Engelm. And *Typha glauca* Godr. *Stands. II. Emergent plant decomposition.* *Aquat. Bot.* 22: 363-375.
- Neill, C. 1992. Life history and population dynamics of whitetop shoots under different levels of flooding and nitrogen supply. *Aquatic. Bot.* 42: 241-252.
- Nelson, W. J., J. A. Kadlec and H. R. Murkin. 1990. Seasonal comparison of weight for two types of *Typha glauca* Godr. leaf litter. *Aquat. Bot.* 37: 299-314.
- Nessel J. 1978. Distribution and dynamics of organic matter and phosphorus in a sewage enriched cypress stand. MS thesis, Univ. of Florida, Gainesville, Fla, 159 pp.
- Neudecker, S. 1979. Effects of grazing and browsing fishes on the zonation of Corals in Guam. *Ecology* 60: 666-672.
- Newell RC, Lucas MI, Linley EAS (1981) Rate of degradation and efficiency of conversion of phytoplankton debris by marine micro-organisms. *Mar Ecol Prog Ser* 6: 123-136
- Newell, R., J. Field and C. Griffiths. 1982. Energy Balance and significance of microorganisms in a kelp bed community. *Mar. Ecol. Progr. Ser.* 8:103-113.

Newell SY, Fell JW, Stutzell-Tallman A, Miller C, Cefalu R (1984). Carbon and nitrogen dynamics in decomposing leaves of three coastal marine vascular plants of the subtropics. *Aquat Bot* 19: 183-192

Newell SY, Fell JW, Miller C (1986) Deposition and decomposition of turtlegrass leaves. *Int Rev Ges Hydrobiol* 71: 363-369

Nicotri, M. E. Grazing effects of four marine intertidal herbivores on the microflora. *Ecology* 58, 1020-1032 (1977)

Nielsen. Aboveground food resources and herbivory in a beech forest ecosystem. *Oikos* 31: 273-279 (1978).

Nienhuis, P. & Groenendijk, A. Consumption of eelgrass (*Zostera marina*) by birds and invertebrates: an annual budget. *Mar. Ecol. Prog. Ser.* 29, 29-35 (1986).

Nihlgard. 1972. Plant biomass, primary production and distribution of chemical elements in a beech and planted spruce forest in southern Sweden. *Oikos* 23: 69-81

Nixon S. and C. Oviatt. 1972. Preliminary measurements of midsummer metabolism in beds of eelgrass, *Zostera marina*. *Ecology* 53:150-153.

Nixon, S. and M. E. Pilson. 1984. Estuarine total system metabolism and organic exchange calculated from nutrient ratios: an example from Narragansett Bay, p. 261-291. *In* V. S Kennedy [ed.], *The Estuary as a filter*. Academic Press.

O'Connell AM (1987) Litter dynamics in Karri (*Eucalyptus diversicolor*) forest of South-Western Australia. *J. Ecol.* 75: 781-796.

O'Connell AM (1988) Nutrient dynamics in decomposing litter in karri (*Eucalyptus diversicolor* F. Muell) forests of South-Western Australia. *J. Ecol.* 76: 1186-1203.

Odum, E. P. (1971). *Fundamentals of Ecology*. 3rd ed. Saunders. Philadelphia, London & Toronto. pp. XIV +574.

Odum, E. P., C. E. Connell and L. B. Davenport. 1962. Population energy flow of three primary consumer components of old-field ecosystems. *Ecology* 43: 88-96.

Odum, H. T. Trophic structure and productivity of Silver Springs, Florida. *Ecol. Monogr.* 27, 55-112 (1957).

Odum, H. T. and R. F. Wilson 1962. Further studies on reareation and metabolism of Texas bays, 1958-1960. *Publ. Inst. Mar. Sci. Univ. Tex.*, 8:20-55.

Oechel, W. & Billings, W. D. in *Arctic Ecosystems in a changing climate. An Ecophysiological perspective.* (eds. Chapin III, F. Stuart, Jefferies, R. L., Reynolds, J. F., Shaver, G. R. & Svoboda, J.) 139-168 (Academic Press, New York, 1992).

- Ohmart, C. P., Stewart, L. G. & Thomas, J. R. Leaf consumption by insects in three Eucalyptus forest types in Southeastern Australia and their role in short-term nutrient cycling. *Oecologia* **59**, 322-330 (1983).
- Olson, J. S. in *Analysis of temperate forest ecosystems. Ecological studies 1* (ed. Reichle, D. E.), 226-246 (Springer-Verlag, New York, 1970).
- Omuf, C., J. Teal and I. Valiela. 1977. Interactions of nutrients, plant growth and herbivory in a mangrove ecosystem. *Ecology* **58**:514-526.
- Ong, J. E. (1993). Mangroves-a carbon source and sink. *Chemosphere* **27**: 1097-1107.
- Ong JE, Gong WK, Wong CH. 1982. Studies on nutrient levels in standing biomass, litter and slash in a mangrove forest. Univ. Sains Malaysia, Penang, Sch. Biol. Sci., 44 p.
- Østergaard, F. and E. Kristensen. 1992. The importance of benthic macrofauna in decomposition of microalgae in a coastal marine sediment. *Limnol. Oceanogr.* **37**:1392-1403.
- Otsuki A and Hanya T. 1972. Production of dissolved organic matter from dead green algal cells. I Aerobic microbial decomposition. *Limnol. Ocanogr* **17**: 248-257
- Ott, J. and L. Maurer. 1977. Strategies of energy transfer from marine macrophytes to consumer levels: the *Posidonia Oceanica* example, p. 493-502. *In* B. Keegan [ed.], *Biology of Benthic Organisms*. Pergamon Press.
- Packard, T. T. 1979. Respiration and respiratory electron transport activity in plankton for the Northwest African upwelling area. *J. Mar. Res.* **37**: 712-739.
- Packard, T. T. and P. J. le B Williams. 1981. Rates of respiratory oxygen consumption and electron transport in surface seawater from the northwest Atlantic. *Oceanologia acta* **4**:351-358.
- Pakarinen, P. 1978. Production and nutrient ecology of three Sphagnum species in southern Finnish raised bogs. *Ann. Bot. Fennia* **15**: 15-26
- Palm CA, Sanchez PA (1990) Decomposition and nutrient release patterns of the leaves of three tropical legumes. *Biotropica* **22**: 330-338
- Panatmat, M. 1988. Ecology and metabolism of a benthic community on an intertidal sandflat. *Int. Revue. ges. Hydrobiol.* **53**: 211-298.
- Pandey, C. B. and J. S. Singh. 1992. Rainfall and grazing effects on net primary productivity in a tropical savanna, India. *Ecology* **73**: 2007-2021.
- Parson, K.A. and A.A. de la Cruz (1980) Energy flow and grazing behavior of conocephaline grasshoppers in a *Juncus roemerianus* marsh. *Ecology* **61**(5):1045-1050

- Patriquin DG and McClung CR. 1978. Nitrogen accretion and the nature and possible significance of N<sub>2</sub> fixation (acetylene reduction) in a Nova Scotia *Spartina alterniflora* stand. *Mar Biol* 47: 227-242
- Pattersen, M., K. Sebans and R. Olsen. 1991. In situ measurements of flow effects on primary production and dark respiration in reef corals. *Limnol. Oceanogr.* 36:936-948.
- Peckol, P. B., J. S. Rivers (1996) Contribution by macroalgal mats to primary production of a shallow embayment under high and low nitrogen-loading rates. *Estuar. Coast. Shelf Sci.* 43: 311-325.
- Pedersen, M. F. and J. Borum. 1996. Nutrient control of algal growth in estuarine waters. Nutrient limitation and the importance of nitrogen requirements and nitrogen storage among phytoplankton and species of macroalgae. *Mar. Ecol. Prog. Ser.* 142: 261-272.
- Peduzzi P, Herndl GJ (1991) Decomposition and significance of seagrass leaf litter (*Cymodocea nodosa*) for the microbial food web in coastal waters (Gulf of Trieste, Northern Adriatic Sea). *Mar Ecol Prog Ser* 71: 163-174
- Pellikaan, G. and P. Nienhuis. 1988. Nutrient uptake and release during growth and decomposition of eelgrass, *Zostera marina* L., and its effect on the nutrient dynamics of Lake Grevelingen. *Aquat. Bot.* 30:189-214.
- Pergent, G., J. Romero, C. Pergent-Martini, M. Mateo and C. Boudouresque. 1994. Primary production, stocks and fluxes in the Mediterranean seagrass *P. oceanica*. *Mar. Ecol. Prog. Ser.* 106: 39-146.
- Perry, M.J. 1976. Phosphate utilization by an oceanic diatom in phosphorus-limited chemostat culture and in the oligotrophic waters of the central North Pacific. *Limnology and Oceanography* 21: 88-107
- Polunin, N. and D. Klumpp. 1992. Algal food supply and grazer demand in a very productive coral-reef zone. *J. Exp. Mar. Biol. Ecol.* 164:1-16.
- Pomeroy, L. R. and J. Johannes. 1968. Occurrence and respiration of ultraplankton in the upper 500 m of the ocean. *Deep Sea Res.* 15: 381-391.
- Poumba, K. 1994. Simulated degradation of phytodetritus in deep-sea sediments of the NE Atlantic (47°N, 19°W). *Mar. Ecol. Progr. Ser.* 105:291-299.
- Prego, R. General aspects of carbon biogeochemistry in the ria of Vigo, northwestern Spain. *Geochim. cosmochim. Acta* 57, 2041-2052 (1993).
- Proctor, J., Anderson, J. M., Fogden, S. C. L. & Vallack, H. W. Ecological Studies in Four Contrasting Lowland Rain Forests in Gunung Mulu National Park, Sarawak. *J. Ecol.* 71, 261-283 (1983).

- Qasim, S and P. Bhattathiri. 1971. Primary production of a seagrass bed on Kavarotti Atoll (Laccavides). *Hydrobiologia* 38: 29-38.
- Randall, J. and J. W. Day. 1987. Effects of River Discharge and vertical circulation in aquatic primary production in a turbid Louisiana (USA) Estuary. *Neth. J. Sea Res.* 21: 231-242.
- Reader, R.J. and J.M. Stewart (1972) The relationship between net primary production and accumulation for a peatland in southeastern Manitoba. *Ecology* 53(6):1024-1037
- Reddy KR, DeBusk WF (1991) Decomposition of water hyacinth detritus in eutrophic lake water. *Hydrobiologia* 211: 101-109.
- Reichardt, W. and G. Dieckmann. In *Antarctic Nutrient Cycles and Food Webs* (eds. Siegfried, W. R., P. R. Condy and R. M. Laws) 115-122 (4<sup>th</sup> SCAR Symposium on Antarctic Biology, Springer-Verlag, New York, 1985).
- Reichle, D. E. & Crossley Jr. D. A. in *Secondary Productivity of Terrestrial Ecosystems* (ed Petruszewicz, K.) 563-581 (U. S Atomic Energy Commission, Warszawa, 1967).
- Reichle DE, Goldstein RA, Van Hook RI, Dodson GJ. 1973. Analysis of insect consumption in a forest canopy. *Ecology* 54: 1076-1084
- Richardson, C.J., G.M. Ferrell, and P. Vaithyanathan (1999) Nutrient effects on stand structure, resorption efficiency, and secondary compounds in everglades sawgrass. *Ecology* 80(7):2182-2192
- Ritchie, M. E., D. Tilman and J. M. H. Knops. 1998. Herbivore effects on plant and nitrogen dynamics in Oak Savanna. *Ecology* 79: 165-177.
- Rizzo, W. and R. Wetzel. 1985. Intertidal and shoal benthic community metabolism in a temperate estuary: studies of spatial and temporal scales of variability. *Estuaries* 8: 342-351.
- Robertson, A. and P. Daniel. 1989. Decomposition and the annual flux of detritus from fallen timber in tropical mangrove forests. *Limnol. Oceanogr.* 34: 640-647.
- Rogers KH, Breen CM (1982) Decomposition of *Potamogeton crispus* L: The effects of drying on the pattern of mass and nutrient loss. *Aquat. Bot.* 12: 1-12.
- Romero, J., Pergent, G., Pergent-Martini, C., Mateo, M. A. & Regnier, C. The detritic compartment in a *Posidonia oceanica* meadow: litter features, decomposition rates and mineral stocks. *P. S. Z. N. I. Mar. Ecol.* 13, 69-83 (1992).
- Rublee PA, Roman MR (1982) Decomposition of turtlegrass (*Thalassia testudinum* Koning) in flowing sea-water tanks and litterbags: compositional changes and comparisons with natural particulate matter. *J Exp Mar Biol Ecol* 58: 47-58

- Sakshaug, E., A. Bjorge, B. Gulliksen, H. Loeng, and F. Mehlum. 1994. Structure, biomass, distribution, and energetics of the pelagic ecosystem in the Barents Sea: A synopsis. *Polar Biol.* 14:405-411.
- Schalles, J. F. & Shure, D. J. Hydrology, community structure, and productivity patterns of a dystrophic Carolina bay Wetland. *Ecol. Monogr.* **59**, 365-385 (1989)
- Schlesinger, W.H. 1978. Community structure, dynamics and nutrient cycling in the Okefenokee cypress swamp forest. *Ecol. Mono.* 48: 43-65
- Schlesinger, W. H. Biogeochemistry: an analysis of global change, 2<sup>nd</sup> ed. (Academic Press, San Diego, CA, 1997)
- Schowalter, T. D., J. W. Webb and D. A. Crossley Jr. 1981. Community structure and nutrient content of canopy arthropods in clearcut and uncut forest ecosystems. *Ecology* 62: 1010-1019.
- Scott, J.A., N.R. French, and J.W. Leethom (1979) Patterns of consumption in grasslands. In: *Perspectives in grassland ecology*. [Ed.] French N.R., New York: Springer-Verlag, 89-105 Cited in *Pomeroy, L.R. and R.G. Wiegert (1981) The Ecology on a Salt Marsh. New York, Springer-Verlag, pp 271*
- Seastedt TR (1988) Mass, nitrogen and phosphorus dynamics in foliage and root detritus of tallgrass prairie. *Ecology* 69: 59-65
- Sfriso A., A. Marcomini (1997). Macrophyte production in a shallow coastal lagoon. Part I: coupling with chemico-physical parameters and nutrients concentrations in waters. *Mar. Environ. Res.* 44: 351-375
- Sharma E, Ambasht RS (1987) Litterfall, decomposition and nutrient release in an age sequence of *Alnus nepalensis* plantation stands in the eastern Himalaya. *J. Ecol.* 75: 997-1010
- Sheldon, S. P. The effects of herbivorous snails on submerged macrophyte communities in Minnesota lakes. *Ecology* **68**, 1920-1931 (1987).
- Shin CN, Rhee GY and Chen J. 1987. Phosphate requirement, photosynthesis and diel cell cycle of *Scenedesmus obliquus* under fluctuating light. *Can J Fish Aquat Sci* 44: 1753-1758
- Sinclair, A. R. E. The resource limitation of trophic levels in tropical grassland ecosystems. *J. Anim. Ecol.* **44**, 497-520 (1975).
- Skjoldal, H. R. & Lännergren, C. The Spring Phytoplankton Bloom in Lindåspollene, a Land-locked Norwegian Fjord. II. Biomass and Activity of Net- and Nanoplankton. *Mar. Biol.* 47, 313-323 (1978).



- Smalley, A. E. 1960. Energy flow of a salt marsh grasshopper population. *Ecology* 41: 672-677.
- Smith, K. L. Jr. 1992. Benthic Boundary Layer Communities and carbon cycling at abyssal depths in the Central North Pacific. *Limnol. Oceanogr.* 37:1034-1057.
- Smith, L. & Clymo, R. S. An extraordinary peat-forming peat-forming community on the Falkland Islands. *Nature* **309**, 617-620 (1984).
- Smith, R. E., W. Harrison, B. Irwin and T. Platt. 1986. Metabolism and carbon exchange in microplankton of the Grand Banks (Newfoundland). *Mar. Ecol. Prog. Ser.* 34: 171-183.
- Smith, S.V. 1973. Carbon dioxide dynamics: a record of organic carbon production, respiration and calcification in the Eniwetok reef flat community. *Limnol. Oceanogr.* 18: 106-120.
- Smith, S. V. and J. T. Hollibaugh. 1993. Coastal metabolism and the oceanic organic carbon balance. *Rev. Geoph.* 31: 75-89.
- Smith, S. V., P. L. Jokiel (1978). Water composition and biogeochemical gradients in the Canton Atoll lagoon. *Atoll. Res. Bull.* 221: 15-53
- Smith, S. V., F. Pesret (1974). Processes of carbon dioxide flux in the Fanning Island lagoon. *Pac. Sci.* 28: 225-245
- Smith, S. V., P. L. Jokiel, G. S. Key (1978) Biogeochemical budgets in coral reef ecosystems. *Atoll Res. Bull.* 220: 1-11.
- Smith, W. O. Jr. 1977. The respiration of photosynthetic carbon in eutrophic areas of the ocean. *J. Mar. Res.* 35:557-565.
- Soholt, L. F. 1973. Consumption of primary production by a population of kangaroo rats (*Dipodomys merriami*) in the Mojave desert. *Ecological Monographs* 43: 357-376.
- Sorokin, Y. 1983. The Black Sea, p. 253-292. *In* B. Ketchum [ed.], *Estuaries and Enclosed Seas. Ecosystems of the World* n° 26 Elsevier.
- Soszka, G. J. The invertebrates on submerged macrophytes in three masurian lakes. *Ekol. pol.* **23**, 371-391 (1975).
- Spencer, P. 1977. Carbon budgets and vertical zonation of atlantic reef corals, p. 391-396. *In* D. Taylor [ed.], *Proceedings of the the third coral reef symposium, (I) Biology.* Springer-Verlag.
- Stanley, D. W. A carbon flow model of epipellic algal productivity in Alaskan Tundra Ponds. *Ecology* **57**, 1034-1042 (1976).

- Strom, S. and N. Welschmeyer. 1991. Pigment specific rates of phytoplankton growth and microzooplankton grazing in the open subarctic Pacific Ocean. *Limnol. Oceanogr.* 36:50-63.
- Strugnell, R. G. & Pigott, C. D. Biomass, shoot-production and grazing of two grasslands in the Rwenzori National Park, Uganda. *J. Ecol.* 66, 73-96 (1978).
- Suess, E. 1980. Particulate organic carbon flux in the oceans: surface productivity and oxygen utilization. *Nature* 288: 260-263.
- Svensson, B.H. and T. Rosswell. 1980. Energy flow through the sub-arctic mire at Stordalan. in: *Ecology of sub-arctic mire* (ed. M. Sonesson). *Ecological Bulletin* no. 30. Swedish Natural Science Research Council. Liber Tryck, Stockholm.
- Tanaka Y (1991) Microbial decomposition of reed (*Phragmites communis*) leaves in a saline lake. *Hydrobiologia* 220: 119-129.
- Tanner, E. 1980. *J of Ecology* 68: 833
- Taylor BR, Parkinson D, Parsons WFJ (1989) Nitrogen and lignin content as predictors of litter decay rates: a microcosm test. *Ecology* 70: 97-104
- Teal, J. 1962. Energy flow in the salt marsh ecosystem of Georgia. *Ecology* 43:615-624.
- Tenhunen, J. D., Lange, O. L., Hahn, S., Siegwolf, R. & Oberbauer, S. F. in *Arctic Ecosystems in a changing climate. An Ecophysiological perspective.* (eds. Chapin III, F. Stuart, Jefferies, R. L., Reynolds, J. F., Shaver, G. R. & Svoboda, J.) 213-238 (Academic Press, New York, 1992).
- Tertsching, W. 1989. Diel activity patterns and foraging dynamics of the sea urchin *Tripneustes ventricosus* in a tropical seagrass community and a reef environment (Virgin Islands). *Mar. Ecol.* 10: 3-21.
- Thornton, D. D. 1971. The effect of complete removal of hippopotamus on grasslands in the Queen Elizabeth National Park, Uganda. *East African Wildlife Journal* 9: 47-55.
- Tijssen, S. B. 1979. Diurnal oxygen rhythm and primary production in the mixed layer of the Atlantic Ocean at 20°N. *Neth. J. Sea Res.* 13: 79-84.
- Tijssen, S. and A. Eijgenraam. 1982 Primary and Community production in the Southern Bight of the North Sea deduced from oxygen concentration variations in the spring of 1980. *Neth. J. Sea Res.* 16: 247-259.
- Tilzer, M. M. Estimation of phytoplankton loss rates from daily photosynthetic rates and observed biomass changes in Lake Constance. *J. Plank. Res.* 6, 309-324 (1984).

- Twilley RR, Blanton LR, Brinson MM, Davis GJ (1985) Biomass production and nutrient cycling in aquatic macrophyte communities of the Chowan River, North Caroline. *Aquat. Bot.* 22: 231-252.
- Twilley RR, Ejdung G, Romare P, Kemp M (1986) A comparative study of decomposition, oxygen consumption and nutrient release for selected aquatic plants occurring in an estuarine environment. *Oikos* 47: 190-198
- Twilley, R., A. Lugo and C. Pattersen-Zuca. 1986. Litter production and turnover in basin mangrove forests in southwest Florida. *Ecology* 67:670-683.
- Udell, H.F., J. Zamdsky and T.E. Doherry. 1969. Productivity and nutrient values of plants growing in the salt marshes of the Town of Hempstead. *Bull. of the Torrey Bot. Club* 96: 42-51
- Urabe, J., M. Nakanishi and K. Kawabata. 1995. Contribution of metazoan plankton to the cycling of nitrogen and phosphorus in Lake Biwa. *Limnol. Oceanogr.* 40: 232-241.
- Vadstein, O., Harkjerr, B., Jensen A., Olsen, Y. & Reinertsen, H. Cycling of organic carbon in the photic zone of a eutrophic lake with special reference to the heterotrophic bacteria. *Limnol. Oceanogr.* **34**, 840-855 (1989).
- Valiela I, Wilson J, Buchsbaum R, Riesma C, Bryant D, Foreman K, Teal J (1984) Importance of chemical composition of salt marsh litter on decay rates and feeding by detritivores. *Bull Mar Sci* 35: 261-269
- Van Cleve, K., R. Barney, and R. Schleuter. 1981. Evidence of temperature control of production and nutrient cycling in two interior Alaska black spruce ecosystems. *Can. J. For. Res* 11: 258-273
- Van Cleve, K., Oliver, L., Schlentner, R., Viereck, L. A. & Dyrness, C. T. Productivity and nutrient cycling in taiga forests ecosystems. *Can. J. For. Res.* **13**, 747-766 (1983).
- Van der Valk, A. and P. Attiwill. 1984. Decomposition of leaf and root litter of *Avicennia marina* at Westernport Bay, Victoria, Australia. *Aquat.Bot.* 18:205-221.
- Van der Valk AG, Rhymer JM, Murkin HR (1991) Flooding and the decomposition of litter of four emergent plant species in a prairie wetland. *Wetlands* 11: 1-16
- Van Hook, R. I. Energy and nutrient dynamics of spider and orthopteran populations in a grassland ecosystem. *Ecol. Monogr.* **41**, 1-25 (1971).
- Van Wick, R. J. 1988. Ecological studies on *Potamogeton pectinatus* L. I. General characteristics, biomass production and life cycles under field conditions. *Aquat. Bot.* **31**, 211-258.

Varley, G. C. (1970). The concept of energy flow applied to a woodland community. In: Animal populations in relation to their food resources. (ed. Watson, A.) pp. 389-405 (10<sup>th</sup> BES Symp, Blackwell Scientific, Oxford).

Velimirov B. and M. Walenta-Simon. 1992. Seasonal changes in specific growth rates, production and biomass of bacterial community in the water column above a Mediterranean seagrass system. *Mar. Ecol. Prog. Ser.* 80: 1237-248.

Vidal, M. 1991. Estudios sobre la dinámica de nutrientes en sistemas estuaricos: flujos sedimento-agua de nutrientes y oxígeno. Ph. D. Tesis. Universidad de Barcelona, Spain.

Wahbeh MI, Mahasneh AM (1985). Some aspects of decomposition of leaf litter of the seagrass *Halophila stipulacea* from the Gulf of Aqaba (Jordan) *Aquat. Bot.* 21: 237-244

Wallace, J. B. & O'Hop, J. Life on a fast pad: waterlily leaf beetle impact on water lilies. *Ecology* 66, 1534-1544 (1985).

Wallentinus I. 1981. Chemical constituents of some baltic macroalgae in relation to environmental factors. *Proc. Int. Seaweed Symp.* 10: 363-370

Walsh, J. J. (1988). How much shelf production reaches the deep sea. In: Productivity of the ocean: present and past. Dahlem Workshop 53. Berlin.

Walsh I, Dymond J, Collier R (1988) Rates of recycling of biogenic components of settling particles in the ocean derived from sediment trap experiments. *Deep-Sea Res* 35:43-58

Wanders, J. B. W. The role of benthic algae in the shallow reef of Curaçao (Netherlands Antilles) III: The significance of grazing. *Aquat. Bot.* 3, 357-390 (1977).

Weisse, T., Müller H., Pinto-Coelho, M., Schweizer, A., Springmann, D. & Baldringer G. Response of the microbial loop to the phytoplankton spring bloom in a large prealpine lake. **35**, 781-794 (1990).

Welschmeyer, N.A., Lorenzen C, J. Chlorophyll budgets: zooplankton grazing and phytoplankton growth in a temperate fjord and the Central Pacific Gyres. *Limnol. Oceanogr.* 30, 1-21 (1985)

Wetzel, R. and P. Penhale. 1983. Photosynthesis, light response and metabolism of submerged macrophyte communities in the lower Chesapeake Bay, p. 50-107. In R.L. Wetzel [ed.], Structural and functional aspects of the ecology of submerged aquatic macrophyte communities in the lower Chesapeake Bay, vol. I. U.S. EPA Final Grant Report No. R 805974 and X003245-01 and Virginia Institute of Marine Science SRAMSOE 267, Gloucester Point, Virginia.

Wheeler, B. D. & Shaw, S. C. Above-ground crop mass and species richness of the principal types of herbaceous rich-fen vegetation of lowland England and Wales. *J. Ecol.* 79, 285-301 (1991).

- White, D., T. Weiss, J. Trapani and L. Thien. 1978. Production and decomposition of the dominant salt marsh plants in Louisiana. *Ecology* 59: 751-759.
- Whitfield, D. W. A. Energy inputs and ecological efficiencies on Truelove Lowland. In: *Truelove Lowland, Devon Island, Canada: A High Arctic Ecosystem* (ed. Bliss, L. C.) pp. 607-620 (University of Alberta Press, Edmonton, 1977).
- Whittaker, R.H. *Communities and Ecosystems* (MacMillan, London, 1975).
- Whittaker, R. H. and G. M. Woodwell. 1969. Structure, production and diversity of the oak pine forest at Brookhaven, New York. *J. Ecol.* 57: 155-174.
- Wiegert, R. & Evans, F. Primary production and the disappearance of dead vegetation on an old field in southeastern Michigan. *Ecology* 45, 49-63 (1964).
- Wielgolaski, F. E. 1975. Functioning of Fennoscandian Tundra Ecosystems. In: *Fennoscandian Tundra Ecosystems. Part 2: Animals and System Analyses* (ed. Wielgolaski, F. E.) 300-326 (Springer-Heidelberg).
- Williams, S. L. and R. C. Carpenter. 1988. Nitrogen-limited primary productivity of coral reef algal turfs: potential contribution of ammonium excreted by *Diadema antillarum*. *Mar. Ecol. Prog. Ser.* 47: 145-152.
- Wolff, M., V. Koch, and V. Isaac (2000) A trophic flow model of the Caeté mangrove estuary (north Brazil) with considerations for the sustainable use of its resources. *Estuarine, Coastal, and Shelf Science* 50:789-803
- Woodwell, G. M. & Botkin, D. B. in *Analysis of temperate forest ecosystems. Ecological studies 1* (ed. Reichle, D. E.), 281-302 (Springer-Verlag, New York, 1970).
- Woodwell, G. M., R. A. Houghton, C. A. S. Hall, D. E. Whitney, R. A. Moll and D. W. Juers. 1979. The Flax Pond ecosystem study: the annual metabolism and nutrient budgets of a salt marsh. pp: 491-511. In: R. L. Jefferies and A. J. Davy (eds.), *Ecological Processes in Coastal Environments. Symposium of the British Ecological Society.* Blackwell Scientific, Oxford, England.
- Yap, H., A. Montebon and R. Dizon. 1994. Energy Flow and seasonality in a tropical coral reef flat. *Mar. Ecol. Prog. Ser.* 103:35-43.
- Zak, D. R., D. Tilman, R. P. Parmenter, C. W. Rice, F. M. Fisher, J. Vose, D. Milchunas, C. W. Martin. 1994. Plant production and soil microorganisms in late-successional ecosystems: a continental study. *Ecology* 75: 2333-2347.
- Zieman, J. C., G. Thayer, M. Robblee and R. Zieman. 1979. Production and export of seagrasses from a tropical bay, p. 21-33. In R. J. Livingston [ed.], *Ecological Processes in Coastal and Marine Systems*, Plenum Press.

Ziemann, D. A., P. K. Bienfag, K.W. Fulton-Bennett, W. Kottenmeier and L.D. Conquest. 1993. Carbon budget for the spring bloom in Auke Bay, Alaska. *Mar. Biol.* 115: 509-521.
